# Supplementary material for: Hypermutability of Damaged Single-Strand DNA Formed at Double-Strand Breaks and Uncapped Telomeres in Yeast Saccharomyces cerevisiae
Source: PubMed Central journal article supplement (PMC2577886; doi:10.1371/journal.pgen.1000264), 2008-11-21
Supplement: pgen.1000264.s001.pdf [file pgen.1000264.s001.pdf]

**Table S1.** Frequencies of spontaneous and UV-induced *can1* mutants associated with DSB-repair

| DSB position <sup>1</sup> | Genotype     | Time in galactose, hr | UV dose, J/m <sup>2</sup> | Frequency of <i>can1</i> mutants (x 10 <sup>4</sup> ) |                                   |               |                               | Transformation to Lys <sup>+</sup> or Ura <sup>+</sup> |                            | % UV-survival (median) <sup>5</sup> |
|---------------------------|--------------|-----------------------|---------------------------|-------------------------------------------------------|-----------------------------------|---------------|-------------------------------|--------------------------------------------------------|----------------------------|-------------------------------------|
|                           |              |                       |                           | among transformants                                   |                                   | in population |                               | median frequency (x 10 <sup>7</sup> )                  | Fold over "no-DSB" control |                                     |
|                           |              |                       |                           | median <sup>2</sup>                                   | range [# of repeats] <sup>3</sup> | median        | range                         |                                                        |                            |                                     |
| no                        | Wild type    | 3                     | 0                         | NA                                                    | NA                                | 0.17          | (0.16-0.29)                   | 16                                                     | NA                         | 100                                 |
| no                        | Wild type    | 3                     | 20                        | NA                                                    | NA                                | 1.1           | (1.0-1.4)                     | 135                                                    | NA                         | 90                                  |
| no                        | Wild type    | 3                     | 45                        | NA                                                    | NA                                | 1.4           | (1.3-1.6)                     | 230                                                    | NA                         | 80                                  |
| no                        | Wild type    | 6                     | 0                         | NA                                                    | NA                                | 0.19          | (0.12-0.54)                   | 47                                                     | NA                         | 100                                 |
| no                        | Wild type    | 6                     | 20                        | NA                                                    | NA                                | 0.99          | (0.65-1.1)                    | 180                                                    | NA                         | 90                                  |
| no                        | Wild type    | 6                     | 45                        | NA                                                    | NA                                | 1.4           | (1.0-1.8)                     | 130                                                    | NA                         | 80                                  |
| <i>tel</i>                | Wild type    | 6                     | 0                         | 62                                                    | (19-81) [8]                       | 0.10          | (0.090-0.22) [4] <sup>4</sup> | 2,600                                                  | NA                         | 100                                 |
| <i>tel</i>                | Wild type    | 6                     | 20                        | 240                                                   | (120-370) [4]                     | 1.0           | (0.80-1.3)                    | 1,750                                                  | NA                         | 70                                  |
| <i>tel</i>                | Wild type    | 6                     | 45                        | 650                                                   | (330-950) [4]                     | 3.1           | (2.3-3.6)                     | 1,550                                                  | NA                         | 30                                  |
| <i>cen</i>                | Wild type    | 3                     | 0                         | 28                                                    | (20-33) [6]                       | 1.0           | (0.68-1.3)                    | 20,500                                                 | 1,281                      | 100                                 |
| <i>cen</i>                | Wild type    | 3                     | 20                        | 190                                                   | (110-280) [8]                     | 1.9           | (1.2-4.5)                     | 19,027                                                 | 141                        | 80                                  |
| <i>cen</i>                | Wild type    | 3                     | 45                        | 470                                                   | (400-630) [8]                     | 3.6           | (1.8-6.8)                     | 10,283                                                 | 45                         | 60                                  |
| <i>cen</i>                | Wild type    | 6                     | 0                         | 9.9                                                   | (6.3-15) [12]                     | 1.0           | (0.85-1.2)                    | 5,625                                                  | 120                        | 100                                 |
| <i>cen</i>                | Wild type    | 6                     | 20                        | 180                                                   | (140-320) [10]                    | 1.8           | (1.1-3.4)                     | 7,235                                                  | 40                         | 80                                  |
| <i>cen</i>                | Wild type    | 6                     | 45                        | 300                                                   | (220-610) [10]                    | 2.8           | (2.1-4.4)                     | 6,532                                                  | 50                         | 40                                  |
| <i>cen</i>                | <i>rad30</i> | 3                     | 0                         | 22                                                    | (14-29) [4]                       | 1.0           | (0.94-1.5)                    | 11,795                                                 | 737                        | 100                                 |
| <i>cen</i>                | <i>rad30</i> | 3                     | 20                        | 260                                                   | (200-340) [4]                     | 1.7           | (1.6-1.8)                     | 8,615                                                  | 64                         | 80                                  |
| <i>cen</i>                | <i>rad30</i> | 3                     | 45                        | 520                                                   | (420-570) [4]                     | 3.3           | (3.0-4.9)                     | 7,764                                                  | 34                         | 40                                  |
| <i>cen</i>                | <i>rad30</i> | 6                     | 0                         | 8.6                                                   | (2.6-13) [8]                      | 1.3           | (1.1-1.8)                     | 1,600                                                  | 34                         | 100                                 |
| <i>cen</i>                | <i>rad30</i> | 6                     | 20                        | 260                                                   | (190-440) [6]                     | 4.9           | (3.9-6.3)                     | 1,599                                                  | 9                          | 50                                  |
| <i>cen</i>                | <i>rad30</i> | 6                     | 45                        | 750                                                   | (560-900) [6]                     | 2.9           | (2.8-3.1)                     | 487                                                    | 4                          | 30                                  |
| <i>cen</i>                | <i>rev1</i>  | 3                     | 0                         | 3.1                                                   | (2.7-3.6) [4]                     | 1.2           | (1.0-1.3)                     | 1,162                                                  | 73                         | 100                                 |
| <i>cen</i>                | <i>rev1</i>  | 3                     | 20                        | 19                                                    | (13-31) [4]                       | 0.7           | (0.49-0.82)                   | 1,014                                                  | 8                          | 40                                  |
| <i>cen</i>                | <i>rev1</i>  | 3                     | 45                        | 55                                                    | (45-63) [4]                       | 0.4           | (0.38-0.47)                   | 525                                                    | 2                          | 30                                  |
| <i>cen</i>                | <i>rev1</i>  | 6                     | 0                         | <4.7 {6}                                              | [6]                               | 0.8           | (0.61-0.83)                   | 1,087                                                  | 23                         | 100                                 |
| <i>cen</i>                | <i>rev1</i>  | 6                     | 20                        | <11 {7}                                               | [6]                               | 0.5           | (0.33-0.59)                   | 796                                                    | 4                          | 40                                  |
| <i>cen</i>                | <i>rev1</i>  | 6                     | 45                        | 30                                                    | (16-38) [4]                       | 0.6           | (0.51-0.61)                   | 771                                                    | 6                          | 30                                  |
| <i>cen</i>                | <i>rev3</i>  | 3                     | 0                         | <4.7 {2}                                              | [6]                               | 0.82          | (0.30-1.1)                    | 875                                                    | 55                         | 100                                 |
| <i>cen</i>                | <i>rev3</i>  | 3                     | 20                        | 8.9                                                   | (7.8-21) [6]                      | 0.26          | (0.18-0.34)                   | 1,051                                                  | 8                          | 40                                  |
| <i>cen</i>                | <i>rev3</i>  | 3                     | 45                        | 31                                                    | (26-45) [4]                       | 0.53          | (0.38-0.68)                   | 515                                                    | 2                          | 30                                  |
| <i>cen</i>                | <i>rev3</i>  | 6                     | 0                         | <2.0 {4}                                              | [6]                               | 0.81          | (0.69-1.90)                   | 888                                                    | 19                         | 100                                 |
| <i>cen</i>                | <i>rev3</i>  | 6                     | 20                        | 9.8                                                   | (6.2-21) [6]                      | 0.50          | (0.33-0.97)                   | 465                                                    | 3                          | 50                                  |
| <i>cen</i>                | <i>rev3</i>  | 6                     | 45                        | 37                                                    | (25-52) [4]                       | 0.59          | (0.50-0.63)                   | 465                                                    | 4                          | 40                                  |

**Table S1.** (continued)

| DSB position <sup>1</sup> | Genotype           | Time in galactose, hr | UV dose, J/m <sup>2</sup> | Frequency of <i>can1</i> mutants (x 10 <sup>4</sup> ) |                                   |               |             | Transformation to Lys <sup>+</sup> or Ura <sup>+</sup> |                            | % UV-survival (median) <sup>5</sup> |
|---------------------------|--------------------|-----------------------|---------------------------|-------------------------------------------------------|-----------------------------------|---------------|-------------|--------------------------------------------------------|----------------------------|-------------------------------------|
|                           |                    |                       |                           | among transformants                                   |                                   | in population |             | median frequency (x 10 <sup>7</sup> )                  | Fold over "no-DSB" control |                                     |
|                           |                    |                       |                           | median <sup>2</sup>                                   | range [# of repeats] <sup>3</sup> | median        | range       |                                                        |                            |                                     |
| <i>cen</i>                | <i>rad30, rev3</i> | 3                     | 0                         | <7.4 {2}                                              | [6]                               | 0.79          | (0.48-0.83) | 948                                                    | 59                         | 100                                 |
| <i>cen</i>                | <i>rad30, rev3</i> | 3                     | 20                        | <19 {4}                                               | [6]                               | 0.34          | (0.24-1.1)  | 1,618                                                  | 12                         | 30                                  |
| <i>cen</i>                | <i>rad30, rev3</i> | 3                     | 45                        | <8.2 {0}                                              | [6]                               | 0.25          | (0.22-0.36) | 632                                                    | 3                          | 20                                  |
| <i>cen</i>                | <i>rad30, rev3</i> | 6                     | 0                         | <5.3 {1}                                              | [4]                               | 0.86          | (0.73-0.96) | 662                                                    | 14                         | 100                                 |
| <i>cen</i>                | <i>rad30, rev3</i> | 6                     | 20                        | <9.0 {0}                                              | [4]                               | 0.33          | (0.25-0.44) | 550                                                    | 3                          | 30                                  |
| <i>cen</i>                | <i>rad30, rev3</i> | 6                     | 45                        | <18 {0}                                               | [4]                               | 0.47          | (0.33-0.65) | 558                                                    | 4                          | 10                                  |
| <i>cen</i>                | <i>pol30-K164R</i> | 6                     | 0                         | <4.7 {12}                                             | [8]                               | 0.70          | (0.43-1.2)  | 5,699                                                  | 121                        | 100                                 |
| <i>cen</i>                | <i>pol30-K164R</i> | 6                     | 20                        | 10                                                    | (4.0-17) [12]                     | 0.24          | (0.21-0.60) | 8,042                                                  | 45                         | 16                                  |
| <i>cen</i>                | <i>pol30-K164R</i> | 6                     | 45                        | <36 {3}                                               | [4]                               | 0.22          | (0.19-0.21) | 1,162                                                  | 9                          | 10                                  |
| <i>cen</i>                | <i>rad5</i>        | 3                     | 0                         | 22                                                    | (20-41) [6]                       | 1.7           | (1.4-1.9)   | 2,193                                                  | 137                        | 100                                 |
| <i>cen</i>                | <i>rad5</i>        | 3                     | 20                        | 200                                                   | (86-250) [6]                      | 1.6           | (0.81-1.9)  | 3,643                                                  | 27                         | 40                                  |
| <i>cen</i>                | <i>ubc13</i>       | 3                     | 0                         | 55                                                    | (45-130) [6]                      | 1.2           | (0.87-1.5)  | 2,751                                                  | 172                        | 100                                 |
| <i>cen</i>                | <i>ubc13</i>       | 3                     | 20                        | 350                                                   | (310-440) [6]                     | 2.2           | (1.4-3.0)   | 5,660                                                  | 42                         | 80                                  |
| <i>cen</i>                | <i>ubc13</i>       | 3                     | 45                        | 500                                                   | (470-690) [4]                     | 2.5           | (2.2-3.2)   | 2,165                                                  | 9                          | 40                                  |
| <i>TRP5</i><br>(Chr. VII) | Wild type          | 6                     | 0                         | 0.32                                                  | (16-0.65) [4]                     | 0.17          | (0.13-0.17) | 195,000                                                |                            | 100                                 |
| <i>TRP5</i><br>(Chr. VII) | Wild type          | 6                     | 20                        | 1.9                                                   | (1.3-2.6) [4]                     | 1.3           | (1.1-1.3)   | 34,500                                                 |                            | 30                                  |

<sup>1</sup> The "no-DSB" cassette was placed into the *LYS2* gene at the same position as the DSB-*cen* cassette (Figure 1A).

<sup>2</sup> Low frequencies were estimated using total number of mutants in all experimental repeats assuming Poisson distribution; total number of mutants obtained in all experiments with small numbers is shown in { }.

<sup>3</sup> There were 4 repeats for the "no-DSB" control.

<sup>4</sup> Frequencies of *can1* mutants in the population was calculated in 4 out of 8 repeats for this variant.

<sup>5</sup> UV-survival was estimated in the population of cells plated after transformation procedure. The procedure included resuspending and centrifugation steps in water as well as in viscous PEG solution, which could lead to uncontrolled loss of cells. Therefore, the numbers were rounded to the first significant digit. The UV-survivals for different genotypes were comparable to the reported values (McDonald et al., 1997; Stelter and Ulrich, 2003; Torres-Ramos et al., 2002) and to the UV-survival for the *rev3, rad30* and *rev3 rad30* mutants in the experiments with *cdc13-1* background, in which there was no transformation procedure (Table S3).

## References to Table S1

McDonald, J.P., Levine, A.S., and Woodgate, R. (1997). The *Saccharomyces cerevisiae* *RAD30* gene, a homologue of *Escherichia coli* *dinB* and *umuC*, is DNA damage inducible and functions in a novel error-free postreplication repair mechanism. *Genetics* 147, 1557-1568.

Stelter, P., and Ulrich, H.D. (2003). Control of spontaneous and damage-induced mutagenesis by SUMO and ubiquitin conjugation. *Nature* 425, 188-191.

Torres-Ramos, C.A., Prakash, S., and Prakash, L. (2002). Requirement of *RAD5* and *MMS2* for postreplication repair of UV-damaged DNA in *Saccharomyces cerevisiae*. *Mol. Cell. Biol.* 22, 2419-2426.
