# Supplementary material for: Hypermutability of Damaged Single-Strand DNA Formed at Double-Strand Breaks and Uncapped Telomeres in Yeast Saccharomyces cerevisiae
Source: PubMed Central journal article supplement (PMC2577886; doi:10.1371/journal.pgen.1000264), 2008-11-21
Supplement: pgen.1000264.s002.pdf [file pgen.1000264.s002.pdf]

**Table S2.** Frequencies of spontaneous and MMS-induced *can1* mutants associated with DSB-repair

| DSB position           | Genotype     | Time in galactose, hr | 0.1% MMS, min | Frequency of <i>can1</i> mutants ( $\times 10^4$ ) |                                   |               |              | Transformation to Lys <sup>+</sup> or Ura <sup>+</sup> |                            | % MMS-survival (median) |
|------------------------|--------------|-----------------------|---------------|----------------------------------------------------|-----------------------------------|---------------|--------------|--------------------------------------------------------|----------------------------|-------------------------|
|                        |              |                       |               | among transformants                                |                                   | in population |              | median frequency ( $\times 10^7$ )                     | Fold over "no-DSB" control |                         |
|                        |              |                       |               | median                                             | range [# of repeats] <sup>1</sup> | median        | range        |                                                        |                            |                         |
| no                     | Wild type    | 6                     | 0             | NA                                                 | NA                                | 0.11          | (0.067-0.15) | 5                                                      | NA                         | 100                     |
| no                     | Wild type    | 6                     | 15            | NA                                                 | NA                                | 0.17          | (0.082-0.23) | 29                                                     | NA                         | 90                      |
| no                     | Wild type    | 6                     | 30            | NA                                                 | NA                                | 0.29          | (0.26-0.33)  | 47                                                     | NA                         | 80                      |
| <i>tel</i>             | Wild type    | 6                     | 0             | 31                                                 | (20-41) [4]                       | 0.40          | (0.36-0.47)  | 1,357                                                  | NA                         | 100                     |
| <i>tel</i>             | Wild type    | 6                     | 15            | 87                                                 | (76-111) [4]                      | 0.58          | (0.51-0.66)  | 1,480                                                  | NA                         | 90                      |
| <i>tel</i>             | Wild type    | 6                     | 30            | 150                                                | (130-180) [4]                     | 0.51          | (0.48-0.54)  | 619                                                    | NA                         | 90                      |
| <i>cen</i>             | Wild type    | 6                     | 0             | 30                                                 | (29-33) [8]                       | 0.91          | (0.78-0.95)  | 4,747                                                  | 1,048                      | 100                     |
| <i>cen</i>             | Wild type    | 6                     | 15            | 210                                                | (180-550) [8]                     | 1.4           | (0.47-1.7)   | 4,727                                                  | 165                        | 90                      |
| <i>cen</i>             | Wild type    | 6                     | 30            | 360                                                | (200-520) [8]                     | 1.6           | (0.66-2.2)   | 7,514                                                  | 161                        | 80                      |
| <i>cen</i>             | <i>rad30</i> | 6                     | 0             | 37                                                 | (29-41) [4]                       | 1.7           | (1.5-1.8)    | 4,105                                                  | 907                        | 100                     |
| <i>cen</i>             | <i>rad30</i> | 6                     | 15            | 320                                                | (280-430) [4]                     | 2.0           | (1.7-2.4)    | 2,361                                                  | 82                         | 90                      |
| <i>cen</i>             | <i>rad30</i> | 6                     | 30            | 500                                                | (430-540) [4]                     | 2.5           | (2.4-2.7)    | 2,667                                                  | 57                         | 80                      |
| <i>cen</i>             | <i>rev3</i>  | 6                     | 0             | 1.2                                                | (0.79-1.5) [4]                    | 1.1           | (0.96-1.4)   | 4,299                                                  | 949                        | 100                     |
| <i>cen</i>             | <i>rev3</i>  | 6                     | 15            | 3.2                                                | (2.3-3.7) [4]                     | 0.56          | (0.47-0.61)  | 1,204                                                  | 42                         | 80                      |
| <i>cen</i>             | <i>rev3</i>  | 6                     | 30            | 3.0                                                | (1.9-4.2) [4]                     | 0.48          | (0.45-0.51)  | 1,562                                                  | 33                         | 70                      |
| <i>TRP5</i> (Chr. VII) | Wild type    | 6                     | 0             | <0.28 {2}                                          | [4]                               | <0.21 {3}     | [4]          | 72,727                                                 | ND                         | 100                     |
| <i>TRP5</i> (Chr. VII) | Wild type    | 6                     | 30            | <0.28{2}                                           | [4]                               | 0.20          | (0.17-0.24)  | 50,379                                                 | ND                         | 90                      |

<sup>1</sup> There were 4 to 8 repeats for the "no-DSB" controls.

See also footnotes 1, 2 and 5 to Table S1
