# Supplementary material for: Hypermutability of Damaged Single-Strand DNA Formed at Double-Strand Breaks and Uncapped Telomeres in Yeast Saccharomyces cerevisiae
Source: PubMed Central journal article supplement (PMC2577886; doi:10.1371/journal.pgen.1000264), 2008-11-21
Supplement: pgen.1000264.s003.pdf [file pgen.1000264.s003.pdf]

Footnotes to Table S3.

<sup>1</sup> *cdc13-1* mutants were examined either as a G1 population after growing for 72 hr at 23°C or after additional incubation for 6 hr in fresh, rich YPDA medium at 37°C to develop G2-arrest associated with uncapped telomeres.

<sup>2</sup> [ ] shown in brackets are the total numbers of mutants obtained in 5 repeats of the experiment for the wild-type and in 2 repeats for translesion DNA polymerase mutants.

<sup>3</sup> Low frequencies were estimated using total number of mutants in all repeats of experiment assuming Poisson distribution; only the upper limit of the 95% CI is shown.

<sup>4</sup> Mutants from the Lys<sup>-</sup> (*LYS2*<sup>+</sup>) category were tested for allelism with tester strains, each carrying a deletion of one of the 6 known *LYS*-genes. Chromosome assignment and distance (kb) from the nearest telomere is shown in parentheses.

"-", not tested
