# Supplementary material for: Hypermutability of Damaged Single-Strand DNA Formed at Double-Strand Breaks and Uncapped Telomeres in Yeast Saccharomyces cerevisiae
Source: PubMed Central journal article supplement (PMC2577886; doi:10.1371/journal.pgen.1000264), 2008-11-21
Supplement: pgen.1000264.s004.pdf [file pgen.1000264.s004.pdf]

**Table S4. Mutation spectrum in the category "can1 - no DSB; UV, 45 J/m<sup>2</sup>"**

| Mutant # | Position in CAN1 (coding strand) | Distance between adjacent mutations | WT base           | Mutant base | Del/Add (-/+ # of nt) | WT sequence context                                                             | Mutant sequence context        | Type of mutation | # of mutations in mutant |
|----------|----------------------------------|-------------------------------------|-------------------|-------------|-----------------------|---------------------------------------------------------------------------------|--------------------------------|------------------|--------------------------|
| c01      | 529                              |                                     | T                 | A           |                       | GGTTTTCTaGGGCAATC                                                               | GGTTTTCTaGGGCAATC              | sub              | 1                        |
| c02      | 1214                             |                                     | C                 | T           |                       | TGGTCTATcAAAGAACA                                                               | TGGTCTATcAAAGAACA              | sub              | 1                        |
| c03      | 625                              |                                     | T                 | -           | -1                    | GATTAGTATTTTTGGG                                                                | GATTAGTA-TTTTTGGG              | indel            | 1                        |
| c04      | 572                              |                                     | CAT               | TA-         |                       | GGCCAAGTcAtTCAATTTT                                                             | GGCCAAGTtA-TCAATTTT            | compl            | 1                        |
| c07      | 1477                             |                                     | A                 | T           |                       | TTAAAGCTaAATTAATG                                                               | TTAAAGCTtAATTAATG              | sub              | 1                        |
| c08      | 925                              |                                     | G                 | A           |                       | CTGCTGGTgAAGCTGCA                                                               | CTGCTGGTtAAGCTGCA              | sub              | 1                        |
| c09      | 212                              |                                     |                   |             | -55                   | GATGGCATaggtgatgaagatgaaggag<br>aagtacagaacgctgaagtgaagagaga<br>gcttaagCAAAGACA | GATGGCAT-----<br>-----CAAAGACA | 55 nt deletion   | 1                        |
| c10      | 979                              |                                     | C                 | T           |                       | TTGTTTTCCGTATCTTA                                                               | TTGTTTTctGTATCTTA              | sub              | 1                        |
| c11      | 559                              |                                     | GT                | TG          |                       | AACTTAGTgtAGTTGGCC                                                              | AACTTAGTtGAGTTGGCC             | compl            | 1                        |
| c12      | 527                              |                                     | C                 | T           |                       | TTGGTTTTcTTGGGCAA                                                               | TTGGTTTTtTTGGGCAA              | sub              | 1                        |
| c13      | 858                              |                                     | G                 | A           |                       | TTAGGTTGgGTTTCCTC                                                               | TTAGGTTGaGTTTCCTC              | sub              | 1                        |
| c14      | 544                              |                                     | GCC               | TTT         |                       | TCACTTTTgcccTGGAACT                                                             | TCACTTTTtttCTGGAACT            | compl            | 1                        |
| c15      | 1226                             |                                     | T                 | -           | -1                    | GAACAAGTtGGCTCCTA                                                               | GAACAAGT-GGCTCCTA              | indel            | 1                        |
| c16      | 1488                             |                                     | C                 | -           | -1                    | TTAATGCCcGGCTGGC                                                                | TTAATGCC-GGCTGGC               | indel            | 1                        |
| c17      | 970                              |                                     | -                 | T           | +1                    | AAAAAGTT-GTTTTCCG                                                               | AAAAAGTTtGTTTTCCG              | indel            | 1                        |
| c18      | 311                              |                                     | C                 | G           |                       | TATTGGTAcAGTCTTT                                                                | TATTGGTAGAGTCTTT               | sub              | 1                        |
| c19      | 627                              |                                     | G                 | A           |                       | ATTTTTGgGTAATTAT                                                                | ATTTTTGtGTAATTAT               | sub              | 1                        |
| c20      | 707                              |                                     | T                 | A           |                       | CAAAGTTTtAGCCATTA                                                               | CAAAGTTtAAGCCATTA              | sub              | 1                        |
| c21      | 1487                             |                                     | C                 | T           |                       | ATTAATGcCGGCTGG                                                                 | ATTAATGctCGGCTGG               | sub              | 1                        |
| c22      | 573                              |                                     | ATT               | GT-         |                       | GCCAAGTcattCAATTTTG                                                             | GCCAAGTcgt-CAATTTTG            | compl            | 1                        |
| c23      | 1089                             |                                     | ATT               | ---         | -3                    | CCTTTATtattGCTATTGA                                                             | CCTTTATT--GCTATTGA             | indel            | 1                        |
| c24      | 700                              |                                     | A                 | G           |                       | CTCCATCaAAGTTTTA                                                                | CTCCATcGAAAGTTTTA              | sub              | 1                        |
| c45      | 691                              |                                     | G                 | C           |                       | TCTGGGTcGCTCCATC                                                                | TCTGGGTcCCTCCATC               | sub              | 1                        |
| c46      | 1557                             |                                     | CC                | TA          |                       | CTTTGCaccAAAATTCA                                                               | CTTTGCAtaAAAATTCA              | compl            | 1                        |
| c47      | 973                              |                                     | AAAAAGTTgTTTTCCGT | -           | -1                    | AAAAAGTTgTTTTCCGT                                                               | AAAAAGTT-TTTTTCCGT             | indel            | 1                        |
| c48      | 1267                             |                                     | C                 | T           |                       | GTGGTGTtCATAcATT                                                                | GTGGTGTtCATAcATT               | sub              | 1                        |
| c49      | 410                              |                                     | C                 | G           |                       | TTCTGTCAcGCAGTCCT                                                               | TTCTGTCAgGCAGTCCT              | sub              | 1                        |
| c50      | 892                              |                                     | C                 | T           |                       | TCACATTTcAAGGTACT                                                               | TCACATTTtAAGGTACT              | sub              | 1                        |
| c51      | 1018                             |                                     | G                 | A           |                       | TATTCATTgGACTTTTA                                                               | TATTCATTaGACTTTTA              | sub              | 1                        |
| c52      | 527                              |                                     | T                 | T           |                       | TTGGTTTTcTTGGGCAA                                                               | TTGGTTTTtTTGGGCAA              | sub              | 1                        |
| c54      | 686                              |                                     | GG                | AA          |                       | GAGTTCTGggTCGCTTCC                                                              | GAGTTCTGaaTCGCTTCC             | compl            | 1                        |
| c55      | 958                              |                                     | CCA               | ---         | -3                    | TCCAAGAGccaTCAAAAAA                                                             | TCCAAGAG--TCAAAAAA             | indel            | 1                        |
| c56      | 452                              |                                     | C                 | T           |                       | TGTTACATcCTCTTCA                                                                | TGTTACATtCTCTTCA               | sub              | 1                        |
| c57      | 1487                             |                                     | C                 | T           |                       | ATTAATGcCGGCTTGG                                                                | ATTAATGctCGGCTTGG              | sub              | 1                        |
| c59      | 226                              |                                     | A                 | -           | -1                    | TGAAGATGaAGGAGAAG                                                               | TGAAGATG-AGGAGAAG              | indel            | 1                        |
| c60      | 1007                             |                                     | ATT--             | TTTTT       |                       | GGCTCTcTtATT-ATTcATTG                                                           | GGCTCTtTtTtATTcATTG            | compl            | 1                        |
| c61      | 263                              |                                     | T                 | C           |                       | GAGAGAGcTAAAGCAA                                                                | GAGAGAGCcTAAAGCAA              | sub              | 1                        |
| c62      | 297                              |                                     | GG                | AA          |                       | CCCTTGGTggTACTATTG                                                              | CCCTTGGTaaTACTATTG             | compl            | 1                        |
| c63      | 615                              |                                     | AGTATTTTTT        | GGTATTTTT-  |                       | CATGGATTaGTATTTTTtGGGTAATT                                                      | CATGGATTgGTATTTTTT-GGGTAATT    | compl            | 1                        |
| c64      | 263                              |                                     | T                 | C           |                       | GAGAGAGcTAAAGCAA                                                                | GAGAGAGCcTAAAGCAA              | sub              | 1                        |
| c65      | 1175                             |                                     | C                 | T           |                       | CGCAAATtCAAATATT                                                                | CGCAAATtAAATATT                | sub              | 1                        |
| c66      | 627                              |                                     | GG                | AA          |                       | ATTTTTTgGgTAATTATC                                                              | ATTTTTTgaaTAATTATC             | compl            | 1                        |
| c67      | 827                              |                                     | GGATAAAAA         | AGATAAAA-   |                       | ATATCTAAgGATAAAAAcGAAGGGA                                                       | ATATCTAAaGATAAAAA-CGAAGGGA     | compl            | 1                        |
| c53      | 838                              |                                     | G                 | A           |                       | ATAAAAAcGaAGGGGAGG                                                              | ATAAAAAcAAGGGGAGG              | sub              | 2                        |
| c53      | 926                              | 88                                  | A                 | G           |                       | TGCTGGTgAGCTGCAA                                                                | TGCTGGTgGAGCTGCAA              | sub              |                          |

See footnotes on the next page

**Footnotes to Table S4 (also relates to Tables S5-S12)**

Categories of mutants are explained in the text and in the legend to Figure 6.

Coordinates are given as in the coding strand of *CAN*, *URA3* starting from the first nucleotide of the *CAN1* and *URA3* ORFs as follows:

- simple base substitution (sub) –coordinate of a mutated base in the wild type sequence;
- simple insertions and deletions (indel)–coordinate of the last unchanged base in the wild type sequence;
- complex mutations (compl) –coordinate of the last unchanged base in the wild type sequence.
