# Supplementary material for: Hypermutability of Damaged Single-Strand DNA Formed at Double-Strand Breaks and Uncapped Telomeres in Yeast Saccharomyces cerevisiae
Source: PubMed Central journal article supplement (PMC2577886; doi:10.1371/journal.pgen.1000264), 2008-11-21
Supplement: pgen.1000264.s005.pdf [file pgen.1000264.s005.pdf]

**Table S5. Mutation spectrum in the category "can1 - DSB-cen ; no UV"**

| Mutant # | Position in CAN1 (coding strand) | Distance between adjacent mutations | WT base | Mutant base | Del/Add (-/+ # of nt) | WT sequence context | Mutant sequence context | Type of mutation | # of mutations in mutant |
|----------|----------------------------------|-------------------------------------|---------|-------------|-----------------------|---------------------|-------------------------|------------------|--------------------------|
| 61       | 670                              |                                     | G       | A           |                       | AATATTACgGTGAATTC   | AATATTACaGTGAATTC       | sub              | 1                        |
| 64       | 271                              |                                     | A       | G           |                       | TTAAGCAAaGACATATT   | TTAAGCAAgGACATATT       | sub              | 1                        |
| 65       | 449                              |                                     | C       | G           |                       | CCCTGTTAcATCCTCTT   | CCCTGTTAgATCCTCTT       | sub              | 1                        |
| 66       | 1279                             |                                     | T       | -           | -1                    | TGCAGTTTtCGTTACTG   | TGCAGTTT - CGTTACTG     | indel            | 1                        |
| 69       | 1000                             |                                     | G       | C           |                       | TCTACATTgGCTCTCTA   | TCTACATTcGCTCTCTA       | sub              | 1                        |
| 71       | 880                              |                                     | C       | -           | -1                    | AACGCTGCcTTCACATT   | AACGCTGC - TTCACATT     | indel            | 1                        |
| 73       | 959                              |                                     | C       | A           |                       | TCCAAGAGcCATCAAAA   | TCCAAGAGaCATCAAAA       | sub              | 1                        |
| 75       | 509                              |                                     | G       | A           |                       | GGCCAATGgTTACATGT   | GGCCAATGaTTACATGT       | sub              | 1                        |
| 76       | 673                              |                                     | G       | A           |                       | ATTACGGTgAATTCGAG   | ATTACGGTaAATTCGAG       | sub              | 1                        |
| 77       | 452                              |                                     | C       | A           |                       | TGTTACATcCTCTTTCA   | TGTTACATaCTCTTTCA       | sub              | 1                        |
| 90       | 1115                             |                                     | G       | -           | -1                    | GTACAAAGgTTTGGCCA   | GTACAAAG - TTTGGCCA     | indel            | 1                        |
| 91       | 703                              |                                     | T       | -           | -1                    | CAAAGTTTtAGCCATTA   | CAAAGTTT - AGCCATTA     | indel            | 1                        |
| 92       | 789                              |                                     | G       | A           |                       | CGTTATTGgAGAAACCC   | CGTTATTGaAGAAACCC       | sub              | 1                        |
| 93       | 422                              |                                     | G       | C           |                       | GTCCTTGGgTGAAATGG   | GTCCTTGGcTGAAATGG       | sub              | 1                        |
| 94       | 1208                             |                                     | G       | A           |                       | TTTATTTGgTCTATCAA   | TTTATTTGaTCTATCAA       | sub              | 1                        |
| 95       | 789                              |                                     | G       | A           |                       | CGTTATTGgAGAAACCC   | CGTTATTGaAGAAACCC       | sub              | 1                        |
| 96       | 1228                             |                                     | CTC     | ---         | -3                    | CAAGTTGGctcCTAAATTC | CAAGTTGG --- CTAATTC    | indel            | 1                        |
| 99       | 673                              |                                     | G       | A           |                       | ATTACGGTgAATTCGAG   | ATTACGGTaAATTCGAG       | sub              | 1                        |
| 100      | 887                              |                                     | C       | G           |                       | TGCCTTCAcATTTCAAG   | TGCCTTCagATTTCAAG       | sub              | 1                        |
| 102      | 430                              |                                     | G       | C           |                       | GTGAAATGgCTACATTC   | GTGAAATGcCTACATTC       | sub              | 1                        |
| 103      | 806                              |                                     | G       | A           |                       | AGGTGCCTgGGGTCCAG   | AGGTGCCTaGGGTCCAG       | sub              | 1                        |
| 104      | 1487                             |                                     | C       | T           |                       | ATTAATGcCcgGCTTGG   | ATTAATGctCcgGCTTGG      | sub              | 1                        |
| 105      | 515                              |                                     | T       | G           |                       | TGGTTACAtGTATTGGT   | TGGTTACAgGTATTGGT       | sub              | 1                        |
| 106      | 443                              |                                     | C       | T           |                       | ATTCATCCcTGTACAT    | ATTCATCCtTGTACAT        | sub              | 1                        |
| 107      | 1018                             |                                     | G       | C           |                       | TATTCATTgGACTTTTA   | TATTCATTcGACTTTTA       | sub              | 1                        |
| 108      | 928                              |                                     | G       | A           |                       | CTGGTGAAGcTGCAAAC   | CTGGTGAaaTGCAAAC        | sub              | 1                        |
| 63       | 665                              |                                     | T       | -           | -1                    | TCAAATATtACGGTGAA   | TCAAATAT - ACGGTGAA     | indel            | 2                        |
| 63       | 1162                             | 497                                 | CT      | AA          |                       | CATTATTTctGCCGAAA   | CATTATTTaaGCCGAAA       | compl            |                          |

See footnotes to Table S4

The *CAN1* coding strand is complementary to unresected strand in the *DSB<sup>cen</sup>* construct
