# Supplementary material for: Hypermutability of Damaged Single-Strand DNA Formed at Double-Strand Breaks and Uncapped Telomeres in Yeast Saccharomyces cerevisiae
Source: PubMed Central journal article supplement (PMC2577886; doi:10.1371/journal.pgen.1000264), 2008-11-21
Supplement: pgen.1000264.s007.pdf [file pgen.1000264.s007.pdf]

**Table S7. Mutation spectrum in the category "*can1* - DSB-*cen* ; UV 45 J/m<sup>2</sup>"**

| Mutant # | Position in <i>CAN1</i> (coding strand) | Distance between adjacent mutations | WT base | Mutant base | Del/Add (-/+ # of nt) | WT sequence context | Mutant sequence context | Type of mutation | # of mutations in mutant |
|----------|-----------------------------------------|-------------------------------------|---------|-------------|-----------------------|---------------------|-------------------------|------------------|--------------------------|
| 317      | 177                                     |                                     | A       | G           |                       | ACGAGAGTgAAATGGCGA  | ACGAGAGTgAAATGGCGA      | sub              | 1                        |
| 319      | 290                                     |                                     | C       | A           |                       | TATGATTGcCCTTGGTG   | TATGATTGcCCTTGGTG       | sub              | 1                        |
| 320      | 941                                     |                                     | A       | -           | -1                    | CCCAGAAAaTCCGTTCC   | CCCAGAAA - TCCGTTCC     | indel            | 1                        |
| 328      | 1217                                    |                                     | -       | G           | +1                    | TATCAAAG - AACAGTT  | TATCAAAGgAACAGTT        | indel            | 1                        |
| 331      | 1679                                    |                                     | A       | T           |                       | AGATGTCGcATCGATT    | AGATGTCGtATCGATT        | sub              | 1                        |
| 325      | 670                                     |                                     | GG      | AA          |                       | AATATTACgGtGAATTCG  | AATATTACaTGAATTCG       | compl            | 1                        |
| 321      | 307                                     |                                     | G       | A           |                       | GTACTATTgGtTACAGGT  | GTACTATTaGTACAGGTC      | compl            | 1                        |
| 322      | 296                                     |                                     | G       | T           |                       | TGCCCTTGgTGGTACTA   | TGCCCTTgTGGTACTA        | sub              | 2                        |
| 322      | 1018                                    | 722                                 | G       | A           |                       | TATTCATTgGACTTTTA   | TATTCATTaGACTTTTA       | sub              |                          |
| 329      | 1179                                    |                                     | T       | A           |                       | AATTCAAAaATTTACGT   | AATTCAAAaATTTACGT       | sub              | 2                        |
| 329      | 1541                                    | 362                                 | G       | T           |                       | TATTCAAAGgTTTCACGG  | TATTCAAAgTTTCACGG       | sub              |                          |
| 332      | 685                                     |                                     | GG      | AA          |                       | CGAGTTCtGgGTCGCTTC  | CGAGTTCtAaGTCGCTTC      | compl            | 2                        |
| 332      | 1418                                    | 733                                 | G       | A           |                       | GCACATCAGaTTTATGC   | GCACATCAaATTTATGC       | sub              |                          |
| 326      | 785                                     |                                     | A       | T           |                       | ATTCGGTTaTTGGAGAA   | ATTCGGTtTTGGAGAA        | sub              | 3                        |
| 326      | 997                                     | 212                                 | A       | T           |                       | CCTTCTACaTTGGCTCT   | CCTTCTAcTTGGCTCT        | sub              |                          |
| 326      | 1175                                    | 178                                 | A       | -           | -1                    | AAATTCAAaTATTTACG   | AAATTCAA - TATTTACG     | indel            |                          |

See footnotes to Table S4

The *CAN1* coding strand is complementary to unresected strand in the DSB-*cen* construct
