# Supplementary material for: Hypermutability of Damaged Single-Strand DNA Formed at Double-Strand Breaks and Uncapped Telomeres in Yeast Saccharomyces cerevisiae
Source: PubMed Central journal article supplement (PMC2577886; doi:10.1371/journal.pgen.1000264), 2008-11-21
Supplement: pgen.1000264.s008.pdf [file pgen.1000264.s008.pdf]

**Table S8. Mutation spectrum in the category "*can1* (from *can1 ura3* set) - DSB-*cen* ; UV, 45 J/m<sup>2</sup>"**

| Mutant # | Position in <i>CAN1</i> (coding strand) | Distance between adjacent mutations | WT base | Mutant base | Del/Add (-/+ # of nt) | WT sequence context     | Mutant sequence context | Type of mutation | # of mutations in mutant |
|----------|-----------------------------------------|-------------------------------------|---------|-------------|-----------------------|-------------------------|-------------------------|------------------|--------------------------|
| 2        | 584                                     |                                     | G       | A           |                       | TCAATTTTgGACGTACA       | TCAATTTTaGACGTACA       | sub              | 1                        |
| 4        | 687                                     |                                     | G       | A           |                       | GAGTTCTGgGTCGCTTC       | GAGTTCTGaGTCGCTTC       | sub              | 1                        |
| 5        | 1143                                    |                                     | A       | -           | -1                    | ACGCTGTtaTCTTAACA       | ACGCTGTT-TCTTAACA       | indel            | 1                        |
| 8        | 130                                     |                                     | G       | T           |                       | TAAAAGATgAGAAAAGT       | TAAAAGATTAGAAAAGT       | sub              | 1                        |
| 9        | 926                                     |                                     | A       | T           |                       | TGCTGGTgAGCTGCAA        | TGCTGGTgAGCTGCAA        | sub              | 1                        |
| 10       | 612                                     |                                     | G       | A           |                       | GCGGCATGgATTAGTAT       | GCGGCATGaATTAGTAT       | sub              | 1                        |
| 16       | 1208                                    |                                     | G       | A           |                       | TTTATTTGgTCTATCAA       | TTTATTTGaTCTATCAA       | sub              | 1                        |
| 19       | 1179                                    |                                     | T       | A           |                       | AATTCAAatATTACGT        | AATTCAAAaATTACGT        | sub              | 1                        |
| 20       | 612                                     |                                     | G       | A           |                       | GCGGCATGgATTAGTAT       | GCGGCATGaATTAGTAT       | sub              | 1                        |
| 21       | 271                                     |                                     | A       | T           |                       | TTAAGCAAaGACATAT        | TTAAGCAATgACATAT        | sub              | 1                        |
| 23       | 673                                     |                                     | G       | A           |                       | ATTACGGTgAATTCGAG       | ATTACGGTaAATTCGAG       | sub              | 1                        |
| 24       | 963                                     |                                     | A       | -           | -1                    | ATCAAAAAaGTTGTTTT       | ATCAAAAA-GTTGTTTT       | indel            | 1                        |
| 25       | 1171                                    |                                     | A       | T           |                       | CTGCCGCaATTCAAAT        | CTGCCGCaATTCAAAT        | sub              | 1                        |
| 27       | 180                                     |                                     | G       | -           | -1                    | AGTAAATGgCGAGGATA       | AGTAAATG-CGAGGATA       | indel            | 1                        |
| 6        | 299                                     |                                     | G       | T           |                       | CCTGGTgTACTATTG         | CCTGGTgTACTATTG         | sub              | 2                        |
| 6        | 1223                                    | 924                                 | A       | T           |                       | AAAGAACAaGTTGGCTC       | AAAGAACAaGTTGGCTC       | sub              |                          |
| 13       | 1037                                    |                                     | A       | G           |                       | TCCATACAaTGACCCTA       | TCCATACAaTGACCCTA       | sub              | 2                        |
| 13       | 1087                                    | 50                                  | A       | T           |                       | CTCCCTTTaTTATTGCT       | CTCCCTTTtTTATTGCT       | sub              |                          |
| 17       | 135                                     |                                     | A       | T           |                       | GATGAGAAaAGTAAAGA       | GATGAGAAaAGTAAAGA       | sub              | 2                        |
| 17       | 530                                     | 395                                 | GG      | AA          |                       | TTTTCTTGgqCAATCACT      | TTTTCTTGaCAATCACT       | compl            |                          |
| 26       | 362                                     |                                     | G       | A           |                       | CCCAGTGGgCGCTCTTA       | CCCAGTGGaCGCTCTTA       | sub              | 2                        |
| 26       | 1706                                    | 1344                                | A       | G           |                       | AGACATTGaGGCAATTG       | AGACATTGgGGCAATTG       | sub              |                          |
| 12       | 673                                     |                                     | G       | A           |                       | ATTACGGTgAATTCGAG       | ATTACGGTaAATTCGAG       | sub              | 3                        |
| 12       | 1208                                    | 535                                 | G       | T           |                       | TTTATTTGgTCTATCAA       | TTTATTTGtTCTATCAA       | sub              |                          |
| 12       | 1698                                    | 490                                 | A       | G           |                       | GATAGAAGaGACATTGA       | GATAGAAGgGACATTGA       | sub              |                          |
| 15       | 965                                     |                                     | -       | G           | +1                    | GCCATCAA-AAAAGTTG       | GCCATCAAgAAAAGTTG       | indel            | 3                        |
| 15       | 1103                                    | 138                                 | A       | T           |                       | TATTGAGaCTCTGGTA        | TATTGAGatCTCTGGTA       | sub              |                          |
| 15       | 1203                                    | 100                                 | A       | T           |                       | CGTATTTTaTTGGTCT        | CGTATTTtTTGGTCT         | sub              |                          |
| 28       | 829                                     |                                     | ATAAAAA | TTAAAAA-    |                       | ATCTAAGGaTAAAAaCGAAGGGA | ATCTAAGGtTAAAA-CGAAGGGA | compl            | 3                        |
| 28       | 1115                                    | 286                                 | A       | G           |                       | TGGTACAAaGGTTTTGC       | TGGTACAAgGGTTTTGC       | sub              |                          |
| 28       | 1129                                    | 14                                  | A       | C           |                       | TGCCACATaTCTTCAAC       | TGCCACATcTCTTCAAC       | sub              |                          |

See footnotes to Table S4

The *CAN1* coding strand is complementary to unresected strand in the DSB-*cen* construct
