# Supplementary material for: Hypermutability of Damaged Single-Strand DNA Formed at Double-Strand Breaks and Uncapped Telomeres in Yeast Saccharomyces cerevisiae
Source: PubMed Central journal article supplement (PMC2577886; doi:10.1371/journal.pgen.1000264), 2008-11-21
Supplement: pgen.1000264.s009.pdf [file pgen.1000264.s009.pdf]

Table S9. Mutation spectrum in the category "ura3 (from can1 ura3 set) - DSB-cen ; UV, 45 J/m<sup>2</sup>"

| Mutant # | Position in URA3 (coding strand) | Distance between adjacent mutations | WT base | Mutant base | Del/Add (-/+ # of nt) | WT sequence context      | Mutant sequence context | Type of mutation | # of mutations in mutant |
|----------|----------------------------------|-------------------------------------|---------|-------------|-----------------------|--------------------------|-------------------------|------------------|--------------------------|
| 3        | 438                              |                                     | CTTTGAT | TTTTGAA     |                       | CTAGAGGCcTTTTGAtGTTAGCAG | CTAGAGGcTTTTGAAgTTAGCAG | compl            | 1                        |
| 5        | 534                              |                                     | T       | C           |                       | AAAGATTTtGTTATCGG        | AAAGATTTcGTTATCGG       | sub              | 1                        |
| 6        | 543                              |                                     | --      | TT          | +2                    | ATCGGCTT--TATTGCTC       | ATCGGCTTtTATTGCTC       | indel            | 1                        |
| 8        | 173                              |                                     | T       | C           |                       | TGTTTACTAAAAACAC         | TGTTTAcAAAAACAC         | sub              | 1                        |
| 11       | 546                              |                                     | TTG     | AAT         |                       | CGGCTTTAtgCTCAAAGA       | CGGCTTTAaatCTCAAAGA     | compl            | 1                        |
| 13       | 258                              |                                     | -       | A           | +1                    | ACAATTTT-TTACTCTT        | ACAATTTTaTTACTCTT       | indel            | 1                        |
| 14       | 335                              |                                     | T       | A           |                       | ATACAGAAAtAGCAGAAT       | ATACAGAAaAGCAGAAT       | sub              | 1                        |
| 15       | 553                              |                                     | C       | T           |                       | TTATTGCTcAAAGAGAC        | TTATTGCTtAAAGAGAC       | sub              | 1                        |
| 16       | 200                              |                                     | --      | TT          | +2                    | TGATTTTT--CCATGGAG       | TGATTTTTtCCATGGAG       | indel            | 1                        |
| 17       | 360                              |                                     | T       | A           |                       | ATTACGAAtGCACACGG        | ATTACGAaAGCACACGG       | sub              | 1                        |
| 18       | 389                              |                                     | T       | A           |                       | AGGTATTGtTAGCGGTT        | AGGTATTGaTAGCGGTT       | sub              | 1                        |
| 19       | 168                              |                                     | T       | A           |                       | AAAAATTGtTACTAAA         | AAAAATTGaTACTAAA        | sub              | 1                        |
| 20       | 373                              |                                     | T       | -           | -1                    | CGGTGTGtGGGCCAG          | CGGTGTGG-GGGCCAG        | indel            | 1                        |
| 22       | 104                              |                                     | C       | T           |                       | GTGTGCTTcATTGGATG        | GTGTGCTTtATTGGATG       | sub              | 1                        |
| 23       | 605                              |                                     | C       | A           |                       | TATGACACcCGGTGTGG        | TATGACACaCGGTGTGG       | sub              | 1                        |
| 27       | 230                              |                                     | T       | C           |                       | TAAGCCGcTAAAGGCAT        | TAAGCCGCcAAAGGCAT       | sub              | 1                        |
| 28       | 2                                |                                     | T       | A           |                       | ATAAATCAAtGTCGAAAG       | ATAAATCAaGTCGAAAG       | sub              | 1                        |
| 30       | 246                              |                                     | A       | -           | -1                    | ATCCGCCAaGTACAATT        | ATCCGCCA-GTACAATT       | indel            | 1                        |
| 33       | 651                              |                                     | T       | G           |                       | CAACAGTAtAGAACCCT        | CAACAGTAgAGAACCCT       | sub              | 1                        |
| 36       | 254                              |                                     | T       | -           | -1                    | CAATTTTTtACTCTTCG        | CAATTTTT-ACTCTTCG       | indel            | 1                        |
| 39       | 698                              |                                     | T       | A           |                       | TATTATTGtTGAAGAG         | TATTATTGaTGAAGAG        | sub              | 1                        |
| 42       | 604                              |                                     | CC      | TT          |                       | TATGACACccGGTGTGGG       | TATGACActtGGTGTGGG      | compl            | 1                        |
| 43       | 356                              |                                     | C       | A           |                       | AGACATTAcGAATGCAC        | AGACATTaGAATGCAC        | sub              | 1                        |
| 44       | 623                              |                                     | C       | -           | -1                    | TTAGATGAcAAGGGAGA        | TTAGATGA-AAGGGAGA       | indel            | 1                        |
| 45       | 242                              |                                     | C       | T           |                       | GGCATTATcCGCCAAGT        | GGCATTATtCGCCAAGT       | sub              | 1                        |
| 47       | 221                              |                                     | T       | A           |                       | GGGCACAGtTAAGCCGC        | GGGCACAGaTAAGCCGC       | sub              | 1                        |
| 48       | 62                               |                                     | T       | C           |                       | TGCCAAGCtATTTAATA        | TGCCAAGCcATTTAATA       | sub              | 1                        |
| 49       | 698                              |                                     | T       | A           |                       | TATTATTGtTGAAGAG         | TATTATTGaTGAAGAG        | sub              | 1                        |
| 50       | 200                              |                                     | -       | T           | +1                    | TGATTTTT-CCATGGAG        | TGATTTTTtCCATGGAG       | indel            | 1                        |
| 56       | 636                              |                                     | T       | -           | -1                    | AGACGCATtGGTCAAC         | AGACGCAT-GGGTCAAC       | indel            | 1                        |
| 57       | 230                              |                                     | T       | C           |                       | TAAGCCGcTAAAGGCAT        | TAAGCCGCcAAAGGCAT       | sub              | 1                        |
| 2        | 159                              |                                     | A       | -           | -1                    | GTCCCAAaTTTGTTTA         | GTCCCAA-TTTGTTTA        | indel            | 2                        |
| 2        | 313                              | 154                                 | T       | A           |                       | AATTGCAGtACTCTGCG        | AATTGCAGaACTCTGCG       | sub              |                          |
| 4        | 537                              |                                     | T       | C           |                       | GATTTTGTtATCGGCTT        | GATTTTGTcATCGGCTT       | sub              | 2                        |
| 4        | 614                              | 77                                  | --      | TT          | +2                    | GTGGGTTT--AGATGACA       | GTGGGTTTtAGATGACA       | indel            |                          |
| 51       | 419                              |                                     | C       | -           | -1                    | AGAAGTAAcAAAGGAAC        | AGAAGTAA-AAAGGAAC       | indel            | 2                        |
| 51       | 473                              | 54                                  | C       | T           |                       | CAAGGGCTcCCTATCTA        | CAAGGGCTtCCTATCTA       | sub              |                          |

See footnotes to Table S4

The *URA3* coding strand corresponds to unresected strand in the DSB-cen construct
