# Supplementary material for: Hypermutability of Damaged Single-Strand DNA Formed at Double-Strand Breaks and Uncapped Telomeres in Yeast Saccharomyces cerevisiae
Source: PubMed Central journal article supplement (PMC2577886; doi:10.1371/journal.pgen.1000264), 2008-11-21
Supplement: pgen.1000264.s011.pdf [file pgen.1000264.s011.pdf]

Table S11. Mutation spectrum in the category "subtelomeric *lys2*, 23oC (no arrest) UV, 45 J/m<sup>2</sup>"

| Mutant number | Position in chromosome V (distance from telomere) | Distance between adjacent mutations | WT base | Mutant base | Del/Add (-/+ # of nt) | WT sequence context | Mutant sequence context | Type of mutation | # of <i>lys2</i> mutations in mutant | # of <i>npr2</i> mutations in mutant <sup>1</sup> |
|---------------|---------------------------------------------------|-------------------------------------|---------|-------------|-----------------------|---------------------|-------------------------|------------------|--------------------------------------|---------------------------------------------------|
| m2            | 4636                                              |                                     | T       | A           |                       | TTTTGATTtAACTTCGA   | TTTTGATTaAACTTCGA       | sub              | 1                                    | 0                                                 |
| m4            | 5088                                              |                                     | G       | A           |                       | TACCTTCGgAACCAGAT   | TACCTTCGaAACCAGAT       | sub              | 1                                    | 0                                                 |
| m7            | 4685                                              |                                     | A       | T           |                       | CCGTACATaTTAACAAT   | CCGTACATtTTAACAAT       | sub              | 1                                    | 0                                                 |
| m114          | 4954                                              |                                     | G       | A           |                       | ATCTCTTtqAATTGGAT   | ATCTCTTtAaAATTGGAT      | sub              | 1                                    |                                                   |
| m118          | 2785                                              |                                     | C       | T           |                       | TAAGAAATcATCTGTGT   | TAAGAAATtATCTGTGT       | sub              | 1                                    |                                                   |
| m120          | 5293                                              |                                     | G       | A           |                       | TACTAGTTqATCCAATT   | TACTAGTTaATCCAATT       | sub              | 1                                    |                                                   |
| m122          | 4926                                              |                                     | A       | T           |                       | GGGCACCTaAAAAATAAT  | GGGCACCTtAAAAATAAT      | sub              | 1                                    |                                                   |
| m124          | 6080                                              |                                     | C       | T           |                       | TTAAATGAcCACGTTGG   | TTAAATGAtCACGTTGG       | sub              | 1                                    |                                                   |
| m127          | 3647                                              |                                     | -       | A           | +1                    | GATACTTG-AAAAATTGT  | GATACTTGaAAAAATTGT      | indel            | 1                                    |                                                   |
| m131          | 6303                                              |                                     | A       | T           |                       | CATGTGGTAcACTGAA    | CATGTGGTtACTGAA         | sub              | 1                                    | 0                                                 |
| m132          | 2542                                              |                                     | T       | A           |                       | CTTCCATTtAGAATAGC   | CTTCCATtAGAATAGC        | sub              | 1                                    |                                                   |
| m135          | 4246                                              |                                     | G       | A           |                       | GAACCCAcgAATTTTAA   | GAACCCAcAATTTTAA        | sub              | 1                                    |                                                   |
| m137          | 5039                                              |                                     | A       | T           |                       | TTGAAATaTAAAGCAA    | TTGAAATAtTAAAGCAA       | sub              | 1                                    | 0                                                 |
| m138          | 2989                                              |                                     | T       | A           |                       | AACAAGTTtATCTGACA   | AACAAGTTaATCTGACA       | sub              | 1                                    | 0                                                 |
| m140          | 3995                                              |                                     | -       | A           | +1                    | TCTTTAAG-AAAGTCCT   | TCTTTAAGaAAAGTCCT       | indel            | 1                                    |                                                   |
| m142          | 4388                                              |                                     | A       | T           |                       | TTATCCAAaTAATTCCA   | TTATCCAAtTAATTCCA       | sub              | 1                                    |                                                   |
| m145          | 3013                                              |                                     | C       | A           |                       | GTAGTATTcAGTGTCaA   | GTAGTATTaAGTGTCaA       | sub              | 1                                    | 0                                                 |
| m149          | 3916                                              |                                     | T       | C           |                       | ATCAACTTtACCATTG    | ATCAACTtACCATTG         | sub              | 1                                    | 0                                                 |
| m150          | 3545                                              |                                     | A       | T           |                       | TCTTCCGCaTAATTGTC   | TCTTCCGCtTAATTGTC       | sub              | 1                                    | 0                                                 |
| m152          | 4246                                              |                                     | G       | A           |                       | GAACCCAcgAATTTTAA   | GAACCCAcAATTTTAA        | sub              | 1                                    |                                                   |

<sup>1</sup> Number of *npr2* mutations found in the variants, in which *NPR2* ORF has been sequenced

See also footnotes to Table S4
