# Supplementary material for: Hypermutability of Damaged Single-Strand DNA Formed at Double-Strand Breaks and Uncapped Telomeres in Yeast Saccharomyces cerevisiae
Source: PubMed Central journal article supplement (PMC2577886; doi:10.1371/journal.pgen.1000264), 2008-11-21
Supplement: pgen.1000264.s012.pdf [file pgen.1000264.s012.pdf]

Table S12. Mutation spectrum in the category "subtelomeric *lys2*, 370C (arrest) UV, 45 J/m<sup>2</sup>"

| Mutant number        | Position in chromosome V (distance from telomere) | Distance between adjacent mutations | WT base | Mutant base | Del/Add (-/+ # of nt) | WT sequence context           | Mutant sequence context       | Type of mutation | # of <i>lys2</i> mutations in mutant | # of <i>npr2</i> mutations in mutant <sup>2</sup> |
|----------------------|---------------------------------------------------|-------------------------------------|---------|-------------|-----------------------|-------------------------------|-------------------------------|------------------|--------------------------------------|---------------------------------------------------|
| m30                  | 4765                                              |                                     | A       | -           | -1                    | AAGAACGCATGATGTAA             | AAGAACGC-TGATGTAA             | indel            | 1                                    |                                                   |
| m37                  | 5503                                              |                                     | -       | T           | +1                    | TAAATCAA-ATAATGGG             | TAAATCAATATAATGGG             | indel            | 1                                    |                                                   |
| m35                  | 5293                                              |                                     | G       | A           |                       | TACTAGTTgATCCAATT             | TACTAGTTaATCCAATT             | sub              | 1                                    |                                                   |
| m40                  | 3545                                              |                                     | A       | T           |                       | TCTTCCGCaTAATTTGC             | TCTTCCGctTAATTTGC             | sub              | 1                                    |                                                   |
| m43                  | 5103                                              |                                     | G       | A           |                       | ATGTGAAAgATAGGGTT             | ATGTGAAAaATAGGGTT             | sub              | 1                                    |                                                   |
| m47                  | 6188                                              |                                     | A       | -           |                       | TCAAAGCGCaCAGCGTAT            | TCAAAGCG- CAGCGTAT            | indel            | 1                                    |                                                   |
| m48                  | 5934                                              |                                     | - , A   | G, G        |                       | TTCCAAAA-aGGCCAAAC            | TTCCAAAAggGGCCAAAC            | compl            | 1                                    |                                                   |
| m77                  | 4249                                              |                                     | T       | A           |                       | CCCACGAATTTAACTT              | CCCACGAAaTTAACTT              | sub              | 2                                    |                                                   |
| m77                  | 5171                                              | 922                                 | A       | G           |                       | TCATATGGaGCCAAGAC             | TCATATGGgGCCAAGAC             | sub              |                                      |                                                   |
| m79                  | 2454                                              |                                     | AG      | TA          |                       | TTCAGGTAagTTGTCTAA            | TTCAGGTAtaTTGTCTAA            | compl            | 2                                    |                                                   |
| m79                  | 6007                                              | 3553                                | G       | -           | -1                    | TCGTCAAAGGAAAAATT             | TCGTCAAA- GAAAAATT            | indel            |                                      |                                                   |
| m84                  | 3394                                              |                                     | C       | A           |                       | TAACAAATcTGCAAGGA             | TAACAAATaTGCAAGGA             | sub              | 2                                    |                                                   |
| m84                  | 5457                                              | 2063                                | G       | A           |                       | CCCTAGAAgAATAGATC             | CCCTAGAAaAATAGATC             | sub              |                                      |                                                   |
| m85                  | 2678                                              |                                     | ACA     | ---         | -3                    | ACGTAGCAacaACAACACG           | ACGTAGCA- --ACAACACG          | indel            | 2                                    |                                                   |
| m85                  | 5108                                              | 2430                                | G       | A           |                       | AAAGATAggTTGGGTT              | AAAGATAGaTTGGGTT              | sub              |                                      |                                                   |
| m87                  | 3139                                              |                                     | A       | G           |                       | ATAAACCCCaGTGAAC TA           | ATAAACCCcGTGAAC TA            | sub              | 2                                    |                                                   |
| m87                  | 4584                                              | 1445                                | G       | A           |                       | TACCAGCAgGCATGACA             | TACCAGCAaGCATGACA             | sub              |                                      |                                                   |
| m21                  | 2513                                              |                                     | A       | G           |                       | CTGTCAATaACAGACGC             | CTGTCAATgACAGACGC             | sub              | 2                                    |                                                   |
| m21                  | 3130                                              | 617                                 | A       | -           | -1                    | GCATATGGaTAAACCCA             | GCATATGG- TAAACCCA            | indel            |                                      |                                                   |
| m28                  | 4180                                              |                                     | T       | A           |                       | AGTAATGTtTTCTCTTA             | AGTAATGTaTTCTCTTA             | sub              | 2                                    |                                                   |
| m28                  | 4424                                              | 244                                 |         |             |                       | TTTTCAAC-AAACCAGTTgTtCACAAATT | TTTTCAACtAAACCAGTTtTcCACAAATT | compl            |                                      |                                                   |
| m29                  | 3081                                              |                                     | A       | C           |                       | CTAAGCTCaTAACATTG             | CTAAGCTCcTAACATTG             | sub              | 2                                    |                                                   |
| m29                  | 3581                                              | 500                                 | A       | G           |                       | TCACCTTGaGATGATCC             | TCACCTTgGATGATCC              | sub              |                                      |                                                   |
| m31                  | 3985                                              |                                     | T       | A           |                       | AGCCAATCtTTCTTTTA             | AGCCAATCaTTCTTTTA             | sub              | 2                                    |                                                   |
| m31                  | 4964                                              | 979                                 | A       | T           |                       | ATTGGATCaTGTGCAAT             | ATTGGATCtTGTGCAAT             | sub              |                                      |                                                   |
| m34                  | 4554                                              |                                     | A       | G           |                       | CAACTAGTgGCTGAACG             | CAACTAGTgGCTGAACG             | sub              | 2                                    |                                                   |
| m34                  | 5821                                              | 1267                                | G       | -           | -1                    | TACAGTAAgCTGTTATA             | TACAGTAA- CTGTTATA            | indel            |                                      |                                                   |
| m38                  | 3211                                              |                                     | A       | -           | -1                    | TCTGAAAGaCCAAATTG             | TCTGAAAG- CCAAATTG            | indel            | 2                                    |                                                   |
| m38                  | 3925                                              | 714                                 | G       | C           |                       | ACCATTGgATTCAATG              | ACCATTGcATTCAATG              | sub              |                                      |                                                   |
| m39                  | 2782                                              |                                     |         |             |                       | TTCAAAAA-TCTCAATAAGaAATCATCT  | TTCAAAAAcTCTCAATAAG-AATCATCT  | compl            | 2                                    |                                                   |
| m39                  | 4386                                              | 1604                                | A       | T           |                       | CCTTATCCaAATAATTC             | CCTTATCCtAATAATTC             | sub              |                                      |                                                   |
| m41                  | 3890                                              |                                     | A       | -           | -1                    | GAGTTGGGaATTGAAGT             | GAGTTGGG- ATTGAAGT            | indel            | 2                                    |                                                   |
| m41                  | 5396                                              | 1506                                | A       | G           |                       | ATAACTGaaAAGGTTGC             | ATAACTGAgAAGGTTGC             | sub              |                                      |                                                   |
| m44                  | 2300                                              |                                     | C       | -           | -1                    | GTA AAAATcCAACCTTG            | GTA AAAAT- CAACCTTG           | indel            | 2                                    |                                                   |
| m44                  | 4860                                              | 2560                                | A       | T           |                       | ACTTACTCaTCCATTCC             | ACTTACTCtTCCATTCC             | sub              |                                      |                                                   |
| m46                  | 5715                                              |                                     | A       | T           |                       | ATGCGGTGaTCAGAGAG             | ATGCGGTGtTCAGAGAG             | sub              | 2                                    | 0                                                 |
| m46                  | 6357                                              | 642                                 | A       | C           |                       | CGTTAGTcATTAGTGAG             | CGTTAGTcTATTAGTGAG            | sub              |                                      |                                                   |
| m19                  | 5553                                              |                                     | G       | A           |                       | AAGTGAAAgAACGGGAC             | AAGTGAAAaAACGGGAC             | sub              | 2                                    |                                                   |
| m19                  | 6078                                              | 525                                 | A       | -           | -1                    | ATTAATGCaCCAGTTG              | ATTAATG- CCAGTTG              | indel            |                                      |                                                   |
| m78                  | 3666                                              |                                     | A       | T           |                       | CCAATGGTaAATCAACT             | CCAATGGTtAATCAACT             | sub              | 3                                    | 0                                                 |
| m78                  | 6311                                              | 2645                                | A       | G           |                       | AACACTGaaAGAGTTGG             | AACACTGAgAGAGTTGG             | sub              |                                      |                                                   |
| m78                  | 6406                                              | 95                                  | A       | -           | -1                    | TTTCACTGaaAATCCAG             | TTTCACTG- AATCCAG             | indel            |                                      |                                                   |
| m83 (N) <sup>1</sup> | 601                                               |                                     | A       | T           |                       | AATCGGAaGAGATCCA              | AATCGGAaTgAGATCCA             | sub              |                                      | 2                                                 |
| m83 (N)              | 851                                               | 250                                 | AT      | TG          |                       | TACTCCGaatGCCTCATA            | TACTCCGatgGCCTCATA            | compl            |                                      |                                                   |
| m83                  | 5375                                              | 4524                                | A       | T           |                       | GCTGGGGaTATGCAGG              | GCTGGGGtTATGCAGG              | sub              | 3                                    |                                                   |
| m83                  | 5831                                              | 456                                 | A, A    | T, G        |                       | TGTTATAaTTAaGTTCAAAA          | TGTTATAaTtTAaGTTCAAAA         | compl            |                                      |                                                   |
| m83                  | 6219                                              | 388                                 | G       | A           |                       | TATCATGAgGCACATCG             | TATCATGaaGCACATCG             | sub              |                                      |                                                   |
| m22                  | 2547                                              |                                     | T       | A           |                       | ATTTAGAAaAGCTTTTCG            | ATTTAGAAaAGCTTTTCG            | sub              | 3                                    | 0                                                 |
| m22                  | 5630                                              | 3083                                | -       | A           | +1                    | TGTCCTGG- AAAATGTC            | TGTCCTGGaAAAATGTC             | indel            |                                      |                                                   |
| m22                  | 5890                                              | 260                                 | A       | C           |                       | GTCCACTAaATGATGCT             | GTCCACTAcATGATGCT             | sub              |                                      |                                                   |

Table S12 - page 2

| Mutant number | Position in chromosome V (distance from telomere) | Distance between adjacent mutations | WT base | Mutant base | Del/Add (-/+ # of nt) | WT sequence context | Mutant sequence context | Type of mutation | # of <i>lys2</i> mutations in mutant | # of <i>npr2</i> mutations in mutant <sup>2</sup> |
|---------------|---------------------------------------------------|-------------------------------------|---------|-------------|-----------------------|---------------------|-------------------------|------------------|--------------------------------------|---------------------------------------------------|
| m33 (N)       | 525                                               |                                     | G       | -           | -1                    | CTCCCTACgAACAGCT    | CTCCCTAC-AACCAGCT       | indel            |                                      | 2                                                 |
| m33 (N)       | 1965                                              | 1440                                | A       | T           |                       | AATGCCGAAACATTGGA   | AATGCCGATACATTGGA       | sub              |                                      |                                                   |
| m33           | 3780                                              | 1815                                | A       | T           |                       | TGGTAGGTaATATACTT   | TGGTAGGTtATATACTT       | sub              | 3                                    |                                                   |
| m33           | 4205                                              | 425                                 | A       | T           |                       | TGTTGGGAaATGTGCGT   | TGTTGGGATATGTGCGT       | sub              |                                      |                                                   |
| m33           | 4494                                              | 289                                 | A       | T           |                       | GAACATAAaTCTCACCT   | GAACATAATCTCACCT        | sub              |                                      |                                                   |
| m42           | 3997                                              |                                     | A       | T           |                       | CTTTAAGAAAGTCCTGA   | CTTTAAGATAGTCCTGA       | sub              | 3                                    | 0                                                 |
| m42           | 5049                                              | 1052                                | -       | A           | +1                    | AGCCAAGG-AAAAATGT   | AGCCAAGGAAAAAATGT       | indel            |                                      |                                                   |
| m42           | 5240                                              | 191                                 | A       | T           |                       | GCGATGGAAaTTGATCT   | GCGATGGATTTGATCT        | sub              |                                      |                                                   |
| m36 (N)       | 865                                               |                                     | A       | T           |                       | TCATACCAaTTGATGAG   | TCATACCATTTGATGAG       | sub              |                                      | 1                                                 |
| m36           | 3376                                              | 2511                                | G       | A           |                       | GTTCTTTGcAGAACGTC   | GTTCTTTGaAGAACGTC       | sub              | 4                                    |                                                   |
| m36           | 3452                                              | 76                                  | G       | -           | -1                    | TAATTGTTgTTTTTCCT   | TAATTGTT-TTTTTCCT       | indel            |                                      |                                                   |
| m36           | 4389                                              | 937                                 | T       | A           |                       | TATCCAAaAATCCAG     | TATCCAAAaAATCCAG        | sub              |                                      |                                                   |
| m36           | 4610                                              | 221                                 | A       | C           |                       | TTTTTCAAaAAGTTGG    | TTTTTCAAcAAGTTGG        | sub              |                                      |                                                   |
| m45 (N)       | 1045                                              |                                     | A       | G           |                       | GCATTGCCaAAATTTCT   | GCATTGCCqAAATTTCT       | sub              |                                      | 1                                                 |
| m45           | 2783                                              | 1738                                | A       | T           |                       | AATAAGAAaTCATCTGT   | AATAAGAAaTCATCTGT       | sub              | 4                                    |                                                   |
| m45           | 3716                                              | 933                                 | G       | A           |                       | GTAGCCAAaTAGAATG    | GTAGCCAAaTAGAATG        | sub              |                                      |                                                   |
| m45           | 4799                                              | 1083                                | G       | A           |                       | GTAGCTTgGcAGTAAG    | GTAGCTTgaGcAGTAAG       | sub              |                                      |                                                   |
| m45           | 6091                                              | 1292                                | G       | A           |                       | CGTTGGTTgAAATATGA   | CGTTGGTTaAAATATGA       | sub              |                                      |                                                   |
| m18           | 3039                                              |                                     | A       | C           |                       | TGGAGGAAaCAAAGTCA   | TGGAGGAACCAAAGTCA       | sub              | 4                                    | 0                                                 |
| m18           | 3168                                              | 129                                 | A       | T           |                       | GGATAATTaTATCAACT   | GGATAATTTATCAACT        | sub              |                                      |                                                   |
| m18           | 4202                                              | 1034                                | G       | T           |                       | GGATGTTGgGAAATGTG   | GGATGTTgtGAAATGTG       | sub              |                                      |                                                   |
| m18           | 6053                                              | 1851                                | A       | T           |                       | TCATTGTTaATTGTAGA   | TCATTGTTtATTGTAGA       | sub              |                                      |                                                   |
| m27 (N)       | 425                                               |                                     | A, G    | -, A        |                       | AGGATTGTaTgCTATCCTG | AGGATTGT-TaCTATCCTG     | compl            |                                      | 1                                                 |
| m27           | 2944                                              | 2519                                | A       | T           |                       | GTTCAATaATCGTCTG    | GTTCAATaATCGTCTG        | sub              | 4                                    |                                                   |
| m27           | 3558                                              | 614                                 | A       | -           | -1                    | TTGCAGTgCaTTTTTCG   | TTGCAGTG-CATTTTCG       | indel            |                                      |                                                   |
| m27           | 4503                                              | 945                                 | A       | T           |                       | TCTCACCTaTTTCGCCA   | TCTCACCTtTTTCGCCA       | sub              |                                      |                                                   |
| m27           | 6043                                              | 1540                                | A       | C           |                       | CCTGTTCAaCTCATTGT   | CCTGTTCAcCTCATTGT       | sub              |                                      |                                                   |
| m88 (N)       | 600                                               |                                     | A       | G           |                       | AAATCGGAaAGAGATCC   | AAATCGGAqAGAGATCC       |                  |                                      | 1                                                 |
| m88           | 2479                                              | 1879                                | A       | G           |                       | GTGTAGCAaAGGATACA   | GTGTAGCagAGGATACA       | sub              | 5                                    |                                                   |
| m88           | 3392                                              | 913                                 | A       | C           |                       | CCTAACAAaCTGCAAG    | CCTAACAAcCTGCAAG        | sub              |                                      |                                                   |
| m88           | 4195                                              | 803                                 | G       | A           |                       | TACCAATGgATGTTGGG   | TACCAATGaATGTTGGG       | sub              |                                      |                                                   |
| m88           | 4393                                              | 198                                 | C       | -           | -1                    | AAATAATTcCAGTGATC   | AAATAATT-CAGTGATC       | indel            |                                      |                                                   |
| m88           | 5238                                              | 845                                 | A       | -           | -1                    | AGCGATGGaATTGATTC   | GAATCAAT-CCATCGTC       | indel            |                                      |                                                   |
| m15           | 3433                                              |                                     | A       | -           | -1                    | ACACCGGTaACAAACAC   | ACACCGGT-ACAAACAC       | indel            | 6                                    | 0                                                 |
| m15           | 3744                                              | 311                                 | G       | A           |                       | CGAAAAaCaAATCATCT   | CGAAAAAcAaAATCATCT      | sub              |                                      |                                                   |
| m15           | 5553                                              | 1809                                | G       | C           |                       | AAGTGAAaAaACGGGAC   | AAGTGAAAaAaACGGGAC      | sub              |                                      |                                                   |
| m15           | 6130                                              | 577                                 | G       | A           |                       | AATATAAAaAACAATAT   | AATATAAAAaAACAATAT      | sub              |                                      |                                                   |
| m15           | 6312                                              | 182                                 | A       | G           |                       | ACACTGAAaGAGTTGGA   | ACACTGAAqGAGTTGGA       | sub              |                                      |                                                   |
| m15           | 6330                                              | 18                                  | T       | A           |                       | TATCCAACtTCTCTATC   | TATCCAACaTCTCTATC       | sub              |                                      |                                                   |

<sup>1</sup> (N) - mutations in these lines were found in *NPR2* ORF; all other lines show mutations located in *LYS2* ORF

<sup>2</sup> Number of *npr2* mutations found in the variants, in which *NPR2* ORF has been sequenced

See also footnotes to Tables S4 and S11
