# Supplementary material for: Hypermutability of Damaged Single-Strand DNA Formed at Double-Strand Breaks and Uncapped Telomeres in Yeast Saccharomyces cerevisiae
Source: PubMed Central journal article supplement (PMC2577886; doi:10.1371/journal.pgen.1000264), 2008-11-21
Supplement: pgen.1000264.s015.pdf [file pgen.1000264.s015.pdf]

**Table S15. Calculated densities of UV-induced mutations**

| Target                 | Origin of mutants                  | Distribution                   | Number of mutations in a mutant |      |     |     |     |     | $X$<br>(mutations per reporter) <sup>3</sup> | $D$<br>(mutations per kb) <sup>4</sup> | $(P_{mut})^5$ | $P(\chi^2)^6$ |
|------------------------|------------------------------------|--------------------------------|---------------------------------|------|-----|-----|-----|-----|----------------------------------------------|----------------------------------------|---------------|---------------|
|                        |                                    |                                | 1                               | 2    | 3   | 4   | 5   | 6   |                                              |                                        |               |               |
| <i>CAN1</i>            | DSB-cen,<br>UV (20) <sup>1</sup>   | Observed                       | 17                              | 6    | 2   | 0   | 0   | 0   | -                                            | -                                      |               | -             |
|                        |                                    | Expected<br>(1-3) <sup>2</sup> | 16.3                            | 6.5  | 1.7 | -   | -   | -   | 0.8                                          | 0.45                                   | 0.55          | 0.9           |
|                        |                                    | Expected<br>(2,3)              | -                               | 5.7  | 1.8 | -   | -   | -   | 0.95                                         | 0.53                                   | 0.61          | 0.8           |
|                        | DSB-cen,<br>UV (45)                | Observed                       | 21                              | 7    | 4   | 0   | 0   | 0   | -                                            | -                                      |               | -             |
|                        |                                    | Expected<br>(1-3)              | 12.2                            | 10.3 | 5.9 | -   | -   | -   | 0.85                                         | 0.48                                   | 0.57          | 0.6           |
|                        |                                    | Expected<br>(2,3)              | -                               | 6.5  | 3.0 | -   | -   | -   | 1.4                                          | 0.79                                   | 0.75          | 0.6           |
| subtel.<br><i>LYS2</i> | 37°C<br>(G2-<br>arrest)<br>UV (45) | Observed                       | 7                               | 16   | 5   | 4   | 1   | 1   | -                                            | -                                      |               | -             |
|                        |                                    | Expected<br>(1-6)              | 9.6                             | 10   | 7.4 | 4   | 1.7 | 0.6 | 2.2                                          | 0.49                                   | 0.88          | 0.4           |
|                        |                                    | Expected<br>(2-6)              | -                               | 15.3 | 7.7 | 2.9 | 0.9 | 0.2 | 1.5                                          | 0.34                                   | 0.78          | 0.7           |

**Footnotes to Table S15.**

<sup>1</sup> UV doze, J/m<sup>2</sup> is shown in parentheses.

<sup>2</sup> Mutant alleles with the multiplicity shown in parentheses were included into calculations.

<sup>3</sup>  $X$  - expected average number of mutations per target.

<sup>4</sup>  $D$  - expected average number of mutations per kilobase in *CAN1* (1773 nt) or *LYS2* (4396 nt) regions.

<sup>5</sup>  $P_{\text{mut}}$  - probability that the cell contains at least one mutation in a target,  $(1-P_0)$ , where  $P_0=e^{-X}$ ;

<sup>6</sup>  $P(\chi^2)$  – probability of differences between observed and expected ratios based on  $\chi^2$  distribution.
