# Supplementary material for: Hypermutability of Damaged Single-Strand DNA Formed at Double-Strand Breaks and Uncapped Telomeres in Yeast Saccharomyces cerevisiae
Source: PubMed Central journal article supplement (PMC2577886; doi:10.1371/journal.pgen.1000264), 2008-11-21
Supplement: pgen.1000264.s016.pdf [file pgen.1000264.s016.pdf]

**Table S16. Simple base substitutions<sup>1</sup>.**

| WT base (in unresected strand) <sup>2</sup> | Mutant base | <i>can1</i> no-DSB; UV (45) <sup>4</sup> (noncoding) <sup>5</sup> | <i>can1</i> DSB- <i>cen</i> ; no UV | <i>can1</i> DSB- <i>cen</i> ; UV (20) | <i>can1</i> DSB- <i>cen</i> ; UV (45) | <i>can1</i> ( <i>can1 ura3</i> ) DSB- <i>cen</i> ; UV (45) | <i>ura3</i> ( <i>can1 ura3</i> ) DSB- <i>cen</i> ; UV (45) | <i>can1</i> DSB- <i>tel</i> ; UV (45) | subtel. <i>LYS2</i> 23°C (no arrest) UV (45) (coding) <sup>5</sup> | subtel. <i>LYS2</i> 37°C (arrest) UV (45) | Corresponding mutation in dsDNA |
|---------------------------------------------|-------------|-------------------------------------------------------------------|-------------------------------------|---------------------------------------|---------------------------------------|------------------------------------------------------------|------------------------------------------------------------|---------------------------------------|--------------------------------------------------------------------|-------------------------------------------|---------------------------------|
| A                                           | G           | 2                                                                 |                                     |                                       |                                       |                                                            |                                                            |                                       | 1                                                                  | 0                                         | AT to GC                        |
| A                                           | T           | 2                                                                 |                                     | 1                                     | 1                                     | 1                                                          |                                                            | 1                                     | 3                                                                  | 6                                         | AT to TA                        |
| A                                           | C           |                                                                   | 1                                   |                                       |                                       |                                                            |                                                            |                                       |                                                                    |                                           | AT to CG                        |
| <b>Total A</b>                              |             | <b>4</b>                                                          | <b>1</b>                            | <b>1</b>                              | <b>1</b>                              | <b>1</b>                                                   | <b>0</b>                                                   | <b>1</b>                              | <b>4</b>                                                           | <b>6</b>                                  |                                 |
| G                                           | A           | 10                                                                | 2                                   | 1                                     |                                       |                                                            |                                                            |                                       | 2                                                                  |                                           | GC to AT                        |
| G                                           | C           | 2                                                                 | 0                                   |                                       |                                       |                                                            |                                                            |                                       |                                                                    |                                           | GC to CG                        |
| G                                           | T           |                                                                   | 2                                   | 1                                     | 1                                     |                                                            |                                                            | 1                                     | 1                                                                  |                                           | GC to TA                        |
| <b>Total G</b>                              |             | <b>12</b>                                                         | <b>4</b>                            | <b>2</b>                              | <b>1</b>                              | <b>0</b>                                                   | <b>0</b>                                                   | <b>1</b>                              | <b>3</b>                                                           | <b>0</b>                                  |                                 |
| <b>PuPu<sup>3</sup> context</b>             |             | <b>14</b>                                                         | <b>3</b>                            | <b>2</b>                              | <b>1</b>                              | <b>0</b>                                                   | <b>0</b>                                                   | <b>2</b>                              | <b>7</b>                                                           | <b>5</b>                                  |                                 |
| <b>Total Pu</b>                             |             | <b>16</b>                                                         | <b>5</b>                            | <b>3</b>                              | <b>2</b>                              | <b>1</b>                                                   | <b>0</b>                                                   | <b>2</b>                              | <b>7</b>                                                           | <b>6</b>                                  |                                 |
|                                             |             |                                                                   |                                     |                                       |                                       |                                                            |                                                            |                                       |                                                                    |                                           |                                 |
| T                                           | C           | 2                                                                 | 1                                   | 3                                     | 1                                     | 4                                                          | 6                                                          | 7                                     |                                                                    | 9                                         | AT to GC                        |
| T                                           | A           | 1                                                                 |                                     | 7                                     | 3                                     | 8                                                          | 9                                                          | 6                                     | 6                                                                  | 17                                        | AT to TA                        |
| T                                           | G           |                                                                   |                                     | 1                                     |                                       | 1                                                          | 1                                                          | 1                                     |                                                                    | 8                                         | AT to CG                        |
| <b>Total T</b>                              |             | <b>3</b>                                                          | <b>1</b>                            | <b>11</b>                             | <b>4</b>                              | <b>13</b>                                                  | <b>16</b>                                                  | <b>14</b>                             | <b>6</b>                                                           | <b>34</b>                                 |                                 |
| C                                           | T           | 5                                                                 | 9                                   | 5                                     | 4                                     | 8                                                          | 4                                                          | 7                                     | 5                                                                  | 14                                        | GC to AT                        |
| C                                           | G           | 1                                                                 | 6                                   |                                       |                                       |                                                            |                                                            |                                       |                                                                    | 2                                         | GC to CG                        |
| C                                           | A           |                                                                   |                                     | 1                                     | 2                                     | 3                                                          | 2                                                          | 2                                     |                                                                    | 1                                         | GC to TA                        |
| <b>Total C</b>                              |             | <b>6</b>                                                          | <b>15</b>                           | <b>6</b>                              | <b>6</b>                              | <b>11</b>                                                  | <b>6</b>                                                   | <b>9</b>                              | <b>5</b>                                                           | <b>17</b>                                 |                                 |
| <b>PyPy-context</b>                         |             | <b>8</b>                                                          | <b>15</b>                           | <b>15</b>                             | <b>8</b>                              | <b>22</b>                                                  | <b>18</b>                                                  | <b>20</b>                             | <b>9</b>                                                           | <b>45</b>                                 |                                 |
| <b>Total Py</b>                             |             | <b>9</b>                                                          | <b>16</b>                           | <b>17</b>                             | <b>10</b>                             | <b>24</b>                                                  | <b>22</b>                                                  | <b>23</b>                             | <b>11</b>                                                          | <b>51</b>                                 |                                 |
|                                             |             |                                                                   |                                     |                                       |                                       |                                                            |                                                            |                                       |                                                                    |                                           |                                 |
| <b>Total substitutions</b>                  |             | <b>25</b>                                                         | <b>21</b>                           | <b>20</b>                             | <b>12</b>                             | <b>25</b>                                                  | <b>22</b>                                                  | <b>25</b>                             | <b>18</b>                                                          | <b>57</b>                                 |                                 |

## Footnotes to Table S16

<sup>1</sup>Complete information on sequences of mutant alleles within each category is provided in Tables S4-S12.

<sup>2</sup>"Unresected strand" is the strand that would remain intact after 5'-->3' resection at the end of a DSB or at uncapped telomere.

(see footnotes to Tables S5-S12 for strand assignment)

Mutations in "no-DSB" or "23oC (no arrest)" controls are assigned to the strand that would remain unresected in the corresponding ssDNA-generating variant.

<sup>3</sup>Pu - purine; Py - Pyrimidine; PuPu and PyPy - two adjacent purines or pyrimidines, respectively.

(Note: PuPu in one strand would correspond to PyPy sequence in the complementary strand for mutations caused by damage in ds DNA.)

<sup>4</sup>UV dose, J/m<sup>2</sup>.

<sup>5</sup>Noncoding strand of *CAN1* in the "no-DSB" and coding strand of *LYS2* in the "subtelomeric *LYS2*, 23°C" experiments correspond to unresected strand in the "DSB-cen" and "subtelomeric *LYS2*, 37°C" experiments, respectively.
