# Supplementary material for: Hypermutability of Damaged Single-Strand DNA Formed at Double-Strand Breaks and Uncapped Telomeres in Yeast Saccharomyces cerevisiae
Source: PubMed Central journal article supplement (PMC2577886; doi:10.1371/journal.pgen.1000264), 2008-11-21
Supplement: pgen.1000264.s018.pdf [file pgen.1000264.s018.pdf]

**Table S18. Base substitutions within complex mutations.**

| WT base (in unresected strand)             | <i>can1</i><br>no-DSB;<br>UV (45)<br>(noncoding) | <i>can1</i><br>DSB-<br><i>cen</i> ;<br>no UV | <i>can1</i><br>DSB-<br><i>cen</i> ;<br>UV (20) | <i>can1</i><br>DSB-<br><i>cen</i> ;<br>UV (45) | <i>can1</i><br>( <i>can1 ura3</i> )<br>DSB- <i>cen</i> ;<br>UV (45) | <i>ura3</i><br>( <i>can1 ura3</i> )<br>DSB- <i>cen</i> ;<br>UV (45) | <i>can1</i><br>DSB- <i>tel</i> ;<br>UV (45) | subtel. <i>LYS2</i><br>23°C<br>(no arrest)<br>UV (45)<br>(coding) | subtel. <i>LYS2</i><br>37°C<br>(arrest)<br>UV (45) |
|--------------------------------------------|--------------------------------------------------|----------------------------------------------|------------------------------------------------|------------------------------------------------|---------------------------------------------------------------------|---------------------------------------------------------------------|---------------------------------------------|-------------------------------------------------------------------|----------------------------------------------------|
| Pu                                         | 7                                                |                                              |                                                |                                                |                                                                     | 1                                                                   |                                             |                                                                   | 1                                                  |
| Py                                         | 12                                               | 2                                            | 10                                             | 6                                              | 3                                                                   | 6                                                                   | 2                                           |                                                                   | 6                                                  |
| <b>Total complex mutations<sup>1</sup></b> | 11                                               | 1                                            | 6                                              | 3                                              | 2                                                                   | 3                                                                   | 1                                           | 0                                                                 | 5                                                  |

<sup>1</sup> Includes all complex mutations regardless of the number and types of changes within a complex mutation.

Also see footnotes to Table S16.
