# Supplementary material for: Hypermutability of Damaged Single-Strand DNA Formed at Double-Strand Breaks and Uncapped Telomeres in Yeast Saccharomyces cerevisiae
Source: PubMed Central journal article supplement (PMC2577886; doi:10.1371/journal.pgen.1000264), 2008-11-21
Supplement: pgen.1000264.s019.pdf [file pgen.1000264.s019.pdf]

## **SUPPLEMENTAL CALCULATIONS**

Utilizing iterations to solve a truncated Poisson distribution, similar to that of (Drake et al., 2005), we estimated the density of UV-induced mutations in *CAN1* and *LYS2* based only on alleles with multiple mutations as well as based on the entire experimental distributions (Table 1, Table S15). First the probability  $P(\chi^2)$  was determined by  $\chi^2$ -test comparing distribution observed in a group and the expected Poisson distribution with average number of mutations in a target (*CAN1* or *LYS2*)  $X=1$ . In the expected Poisson distribution, only the members with the numbers of mutations present in the experimental distribution were calculated. Then the calculation of  $P(\chi^2)$  was repeated for  $X=2$ . The size and direction of each next step was chosen with the goal of increasing  $P(\chi^2)$  based on comparison of the two previous steps. The iterations were stopped when the steps were as little as 0.05. (Note: the distribution of multiples within the "DSB-*tel*, UV" group could not be approximated by Poisson formula with likelihood  $>0.05$  (not shown).)

## **REFERENCE**

Drake, J.W., Bebenek, A., Kissling, G.E., and Peddada, S. (2005). Clusters of mutations from transient hypermutability. *Proc. Natl. Acad. Sci. U S A* 102, 12849-12854.
