# Supplementary material for: Hypermutability of Damaged Single-Strand DNA Formed at Double-Strand Breaks and Uncapped Telomeres in Yeast Saccharomyces cerevisiae
Source: PLoS Genet. 2008 Nov 21;4(11):e1000264. doi: 10.1371/journal.pgen.1000264 (PMC2577886; doi:10.1371/journal.pgen.1000264)
Supplement: Table S6 — Mutation spectrum in the category “can1 - DSB-cen; UV, 20 J/m2”. (0.02 MB PDF) [file pgen.1000264.s006.pdf]

**Table S6. Mutation spectrum in the category "*can1* - DSB-*cen* ; UV, 20 J/m<sup>2</sup>"**

| Mutant # | Position in <i>CAN1</i> (coding strand) | Distance between adjacent mutations | WT base | Mutant base | Del/Add (-/+ # of nt) | WT sequence context    | Mutant sequence context | Type of mutation | # of mutations in mutant |
|----------|-----------------------------------------|-------------------------------------|---------|-------------|-----------------------|------------------------|-------------------------|------------------|--------------------------|
| 120      | 619                                     |                                     | T       | -           | -1                    | GTATTTTtGGGTAATT       | GTATTTTt-GGGTAATT       | indel            | 1                        |
| 122      | 894                                     |                                     | A       | T           |                       | ACATTTCaAGGTAAGTGA     | ACATTTCaAGGTAAGTGA      | sub              | 1                        |
| 123      | 941                                     |                                     | A       | -           | -1                    | CCCAGAAAaTCCGTTCC      | CCCAGAAA-TCCGTTCC       | indel            | 1                        |
| 125      | 252                                     |                                     | A       | -           | -1                    | TGAAGTGAaGAGAGAGC      | TGAAGTGA-GAGAGAGC       | indel            | 1                        |
| 126      | 703                                     |                                     | -       | T           | 1                     | AAAGTTTt-AGCCATTA      | AAAGTTTtAGCCATTA        | indel            | 1                        |
| 127      | 548                                     |                                     | GG      | AA          |                       | TTTGCCCTgqAACTTAGT     | TTTGCCCTaaAACTTAGT      | compl            | 1                        |
| 130      | 685                                     |                                     | G       | T           |                       | GAATTCGAgTTCGGGT       | GAATTCGAtTTCGGGT        | sub              | 1                        |
| 133      | 424                                     |                                     | G       | -           | -1                    | CCTTGGGTgAAATGGCT      | CCTTGGGT-AAATGGCT       | indel            | 1                        |
| 135      | 669                                     |                                     | GG      | AA          |                       | AATATTACgqTGAATTCG     | AATATTACaaTGAATTCG      | compl            | 1                        |
| 136      | 1314                                    |                                     | ATGG    | TTG-        |                       | TGGCTTACaTGgAGACATCT   | TGGCTTACtTG-AGACATCT    | compl            | 1                        |
| 137      | 970                                     |                                     | G       | -           | -1                    | TCAAAAAaTtGTTTTTC      | TCAAAAAA-TTGTTTTTC      | indel            | 1                        |
| 139      | 228                                     |                                     | G       | -           | -1                    | AGATGAAGgAGAAGTAC      | AGATGAAG-AGAAGTAC       | indel            | 1                        |
| 142      | 380                                     |                                     | A       | -           | -1                    | TCATATTTaTTTATGGG      | TCATATTT-TTTATGGG       | indel            | 1                        |
| 219      | 1538                                    |                                     | A       | G           |                       | CATTATTCaAGGTTTCA      | CATTATTcAGGTTTCA        | sub              | 1                        |
| 221      | 741                                     |                                     | T       | A           |                       | TGTTTTTgTATGGTTTG      | TGTTTTTGaATGGTTTG       | sub              | 1                        |
| 233      | 943                                     |                                     | A       | T           |                       | ACCCAGAAaAATCCGTT      | ACCCAGAtAATCCGTT        | sub              | 1                        |
| 241      | 585                                     |                                     | G       | A           |                       | CAATTTTGgACGTACAA      | CAATTTTGaACGTACAA       | sub              | 1                        |
| 121      | 271                                     |                                     | A       | G           |                       | TTAAGCAAaGACATATT      | TTAAGCAAaGACATATT       | sub              | 2                        |
| 121      | 936                                     | 665                                 | C       | A           |                       | GCTGCAAAaCCCAGAAA      | GCTGCAAAaCCCAGAAA       | sub              |                          |
| 128      | 625                                     |                                     | GG      | AA          |                       | TATTTTTTgqGTAATTAT     | TATTTTTTaaGTAATTAT      | compl            | 2                        |
| 128      | 1435                                    | 810                                 | A       | T           |                       | AAGCTTTGaaAATACCGT     | AAGCTTTGtAATACCGT       | sub              |                          |
| 129      | 132                                     |                                     | G       | A           |                       | AAAGATGAgAAAAGTAA      | AAAGATGAAAAAGTAA        | sub              | 2                        |
| 129      | 1234                                    | 1102                                | A       | T           |                       | TGGCTCCTaAATTCCTG      | TGGCTCCTtAATTCCTG       | sub              |                          |
| 229      | 611                                     |                                     | G       | A           |                       | GGCGGCATgGATTAGTA      | GGCGGCATaGATTAGTA       | sub              | 2                        |
| 229      | 665                                     | 54                                  | T       | -           | -1                    | TCAAATATtACGGTGAA      | TCAAATAT-ACGGTGAA       | indel            |                          |
| 232      | 26                                      |                                     | A       | C           |                       | AGACGCCGcCATAGAGG      | AGACGCCGcCATAGAGG       | sub              | 2                        |
| 232      | 548                                     | 522                                 | GG      | AA          |                       | TTTGCCCTgqAACTTAGT     | TTTGCCCTaaAACTTAGT      | compl            |                          |
| 138      | 789                                     |                                     | A       | G           |                       | GTTATTGGaGAAA-CCCAGGTG | GTTATTGGgGAAAaCCCAGGTG  | compl            | 2                        |
| 138      | 906                                     | 117                                 | A       | T           |                       | ACTGAACTaGTTGGTAT      | ACTGAACTtGTTGGTAT       | sub              |                          |
| 141      | 255                                     |                                     | G       | A           |                       | GCTGAAGTgAAGAGAGA      | GCTGAAGTaAAGAGAGA       | sub              | 3                        |
| 141      | 687                                     | 432                                 | G       | A           |                       | GAGTTCTGgGTCGCTTC      | GAGTTCTGaGTCGCTTC       | sub              |                          |
| 141      | 1405                                    | 718                                 | A       | T           |                       | TTATCTCAaTCTCGCAC      | TTATCTCaTCTCGCAC        | sub              |                          |
| 220      | 275                                     |                                     | A       | T           |                       | GCAAAGACaTATTGGTA      | GCAAAGActTATTGGTA       | sub              | 3                        |
| 220      | 1106                                    | 831                                 | C       | T           |                       | TGAGAACTcTGGTACAA      | TGAGAACTtTGGTACAA       | sub              |                          |
| 220      | 1512                                    | 406                                 | A       | G           |                       | GCGGCCACaTTTATGAC      | GCGGCCACgTTTATGAC       | sub              |                          |

See footnotes to Table S4

The *CAN1* coding strand is complementary to unresected strand in the DSB<sup>cen</sup> construct
