# Supplementary material for: Hypermutability of Damaged Single-Strand DNA Formed at Double-Strand Breaks and Uncapped Telomeres in Yeast Saccharomyces cerevisiae
Source: PLoS Genet. 2008 Nov 21;4(11):e1000264. doi: 10.1371/journal.pgen.1000264 (PMC2577886; doi:10.1371/journal.pgen.1000264)
Supplement: Table S10 — Mutation spectrum in the category “can1 - DSB-tel; UV, 45 J/m2”. (0.02 MB PDF) [file pgen.1000264.s010.pdf]

Table S10. Mutation spectrum in the category "*can1* - DSB-*tel* ; UV, 45 J/m<sup>2</sup>"

| Mutant # | Position in <i>CAN1</i> (coding strand) | Distance between adjacent mutations | WT base | Mutant base | Del/Add (-/+ # of nt) | WT sequence context | Mutant sequence context | Type of mutation | # of mutations in mutant |
|----------|-----------------------------------------|-------------------------------------|---------|-------------|-----------------------|---------------------|-------------------------|------------------|--------------------------|
| T55      | 1632                                    |                                     | C       | T           |                       | TCTTATTTcAATGCATA   | TCTTATTTtAATGCATA       | sub              | 1                        |
| T56      | 1185                                    |                                     | C       | A           |                       | AATATTTTAcGTTGGTTC  | AATATTTTaaGTTGGTTC      | sub              | 1                        |
| T58      | 977                                     |                                     | T       | C           |                       | AGTTGTTTtCCGTATCT   | AGTTGTTTcCCGTATCT       | sub              | 1                        |
| T59      | 577                                     |                                     | C       | T           |                       | AAGTCATTcAATTTTGG   | AAGTCATTtAATTTTGG       | sub              | 1                        |
| T49      | 519                                     |                                     | T       | A           |                       | TACATGTAtTGGTTTTC   | TACATGTaaTGGTTTTC       | sub              | 2                        |
| T49      | 1071                                    | 552                                 | T       | A           |                       | TCCTACGTtTCTACTTC   | TCCTACGTaTCTACTTC       | sub              |                          |
| T50      | 900                                     |                                     | T       | C           |                       | CAAGGTACTcGAAC TAGT | CAAGGTACcGAAC TAGT      | sub              | 2                        |
| T50      | 1211                                    | 311                                 | T       | C           |                       | ATTGGTCTcATCAAAGA   | ATTGGTCCaATCAAAGA       | sub              |                          |
| T51      | 419                                     |                                     | T       | A           |                       | GCAGTCCTtGGGTGAAA   | GCAGTCCTaGGGTGAAA       | sub              | 2                        |
| T51      | 540                                     | 121                                 | T       | C           |                       | GCAATCACtTTTGCCCTG  | GCAATCACcTTTGCCCTG      | sub              |                          |
| T52      | 1029                                    |                                     | T       | G           |                       | CGCCGACAtAGAGGAGA   | CGCCGACaGAGAGGAGA       | sub              | 2                        |
| T52      | 1442                                    | 413                                 | C       | A           |                       | CATTcATCcCTGTTACA   | CATTcATCaCTGTTACA       | sub              |                          |
| T53      | 264                                     |                                     | T       | C           |                       | AGAGAGCTtAAGCAAAG   | AGAGAGCTcAAGCAAAG       | sub              | 2                        |
| T53      | 553                                     | 289                                 | C       | T           |                       | CCCTGGAAcTTAGTGTA   | CCCTGGAAtTTAGTGTA       | sub              |                          |
| T54      | 1163                                    |                                     | C       | T           |                       | CATTATTTcTGCCGCAA   | CATTATTTtTGCCGCAA       | sub              | 2                        |
| T54      | 1202                                    | 39                                  | T       | C           |                       | CCGTATTTtATTGGTTC   | CCGTATTTcATTGGTTC       | sub              |                          |
| T57      | 851                                     |                                     | T       | A           |                       | GAGGTTCTtAGGTGGG    | GAGGTTCTaAGGTGGG        | sub              | 2                        |
| T57      | 1455                                    | 604                                 | C       | T           |                       | TACATCCTcTTTCACAG   | TACATCCTtTTTCACAG       | sub              |                          |
| T60      | 402                                     |                                     | T       | A           |                       | TTGGCATAtTCTGTCAC   | TTGGCATAaTCTGTCAC       | sub              | 2                        |
| T60      | 1058                                    | 656                                 | C       | T           |                       | AACACAATcTACTTCCT   | AACACAATtTACTTCCT       | sub              |                          |
| T61      | 99                                      |                                     | C       | T           |                       | CAAACACAcCACAGACG   | CAAACACAtCACAGACG       | sub              | 2                        |
| T61      | 937                                     | 838                                 | CC      | AT          |                       | CTGCAAAcCccCAGAAAAT | CTGCAAAcAtCAGAAAAT      | compl            |                          |
| T62      | 862                                     |                                     | -       | T           | +1                    | TTGGGTTT-CCTCTTTG   | TTGGGTTTtCCTCTTTG       | indel            | 2                        |
| T62      | 1551                                    | 689                                 | T       | C           |                       | TTcACGGCtTTTGCACC   | TTcACGGCcTTTGCACC       | sub              |                          |
| T63      | 836                                     |                                     | A       | T           |                       | GGATAAAAaCGAAGGGA   | GGATAAAAtCGAAGGGA       | sub              | 2                        |
| T63      | 1179                                    | 343                                 | T       | A           |                       | AATTCAAAtATTACGT    | AATTCAAaaATTACGT        | sub              |                          |
| T64      | 530                                     |                                     | G       | T           |                       | GTTTTCtTgGGCAATCA   | GTTTTCtTtGGCAATCA       | sub              | 2                        |
| T64      | 1025                                    | 495                                 | -       | T           | +1                    | GGACTTTT-AGTTCcAT   | GGACTTTTtAGTTCcAT       | indel            |                          |

See footnotes to Table S4

The *CAN1* coding strand corresponds to unresected strand in the DSB-*tel* construct
