# Supplementary material for: Hypermutability of Damaged Single-Strand DNA Formed at Double-Strand Breaks and Uncapped Telomeres in Yeast Saccharomyces cerevisiae
Source: PLoS Genet. 2008 Nov 21;4(11):e1000264. doi: 10.1371/journal.pgen.1000264 (PMC2577886; doi:10.1371/journal.pgen.1000264)
Supplement: Table S17 — Simple indels. (0.03 MB PDF) [file pgen.1000264.s017.pdf]

**Table S17. Simple indels.**

| WT base (in unresected strand) <sup>1</sup> | <i>can1</i><br>no-DSB;<br>UV (45)<br>(noncoding) | <i>can1</i><br>DSB-<br><i>cen</i> ;<br>no UV | <i>can1</i><br>DSB-<br><i>cen</i> ;<br>UV (20) | <i>can1</i><br>DSB-<br><i>cen</i> ;<br>UV (45) | <i>can1</i><br>( <i>can1 ura3</i> )<br>DSB- <i>cen</i> ;<br>UV (45) | <i>ura3</i><br>( <i>can1 ura3</i> )<br>DSB- <i>cen</i> ;<br>UV (45) | <i>can1</i><br>DSB- <i>tel</i> ;<br>UV (45) | subtel. <i>LYS2</i><br>23°C<br>(no arrest)<br>UV (45)<br>(coding) | subtel. <i>LYS2</i><br>37°C<br>(arrest)<br>UV (45) |
|---------------------------------------------|--------------------------------------------------|----------------------------------------------|------------------------------------------------|------------------------------------------------|---------------------------------------------------------------------|---------------------------------------------------------------------|---------------------------------------------|-------------------------------------------------------------------|----------------------------------------------------|
| run of A                                    | 2                                                | 3                                            | 2                                              |                                                |                                                                     |                                                                     |                                             |                                                                   |                                                    |
| run of G                                    |                                                  | 1                                            |                                                |                                                | 1                                                                   |                                                                     |                                             |                                                                   |                                                    |
| run of T                                    |                                                  |                                              | 2                                              | 2                                              | 2                                                                   | 6                                                                   | 2                                           | 2                                                                 | 4                                                  |
| run of C                                    |                                                  | 1                                            | 1                                              |                                                |                                                                     | 2                                                                   |                                             |                                                                   |                                                    |
| <b>Total indels</b> <sup>2</sup>            | <b>9</b>                                         | <b>6</b>                                     | <b>9</b>                                       | <b>3</b>                                       | <b>4</b>                                                            | <b>12</b>                                                           | <b>2</b>                                    | <b>2</b>                                                          | <b>19</b>                                          |

<sup>1</sup>Only indel mutations in which deleted or inserted base(s) can be unambiguously assigned to a homonucleotide run were categorized

<sup>2</sup> Includes all simple indel mutations, regardless of the presence of a homonucleotide run.

Also see footnotes to Table S16.
